# Supplementary material for: Membrane Phosphoproteomics of Yeast Early Response to Acetic Acid: Role of Hrk1 Kinase and Lipid Biosynthetic Pathways, in Particular Sphingolipids
Source: Front Microbiol. 2017 Jul 12;8:1302. doi: 10.3389/fmicb.2017.01302 (PMC5506226; doi:10.3389/fmicb.2017.01302)
Supplement: Supplementary file 1 [file Table_1.XLSX]

## Sheet: Table S1
	Membrane phosphoproteomics of yeast early response to acetic acid: role of Hrk1 kinase and lipid biosynthetic pathways, in particular sphingolipids
	Joana F. Guerreiro1+, Nuno P. Mira1+, Aline X.S. Santos2, Howard Riezman2 and Isabel Sá-Correia1*
	*Correspondence:
	Prof. Isabel Sá-Correia
	e-mail: isacorreia@tecnico.ulisboa.pt
	Supplementary table S1. List of phosphopeptides that were quantified in the different proteins analyzed in this work. The abundance of each phosphopeptide in the different protein extracts was quantified using a label free LC-MS/MS based approach. The abundance values obtained in each protein extract examined are shown along with the data that allowed identification of the peptide and/or of the p…
												wt control		wt acetic acid		rhrk1 control		rhrk1 acetic acid
	Peptide	Type of PTM	Matched protein	Previously identified as a phosphopeptide?	peak number	m/z	Retention time (min)	Retention time window (min)	Charge	Anova	Maximum CV	Average normalized abundance	Standard deviation	Average normalized abundance	Standard deviation	Average normalized abundance	Standard deviation	Average normalized abundance	Standard deviation	Score	Mass error (u)	Mass error (ppm)
	Phosphopeptides with identified PTMs
	713-ADDEEDLSDENIQPELRGQ-731	[8] Phospho (ST)	Abf1	Y		1126.97	59.9124	0.8002	2	2.33538e-06	36.9985	44546.7	10135.5	41525	5168.76	1.25333e+06	463714	61376.2	11952.9	37	0.00515305	2.2883
	702-SLLRDEEDVEGTDGRR-717	[1] Phospho (ST)	Adp1	Y	1118	642.958	52.9788	1.27925	3	0.00290931	76.1171	321422	77140.1	466578	108926	104395	79462.6	860480	262824	23.17	0.00406383	2.11015
	65-RADQGPQDEVEATQMNDLTSAISPSSR-91	[15] Oxidation (M); [26] Phospho (ST)	Agp1	Y	2306	1000.44	61.5881	1.0899	3	0.000109936	45.4806	166027	75509.9	759126	250129	105193	43078.8	1.5269e+06	156178	28.82	0.00476336	1.58869
	6-S*LYELK-11	[1] Phospho (ST)	Agp1	N	203	832.387	57.4516	0.78575	1	4.11503e-05	29.7638	318434	80283.1	1.20975e+06	135374	600453	178718	3.20255e+06	800444	30.16	0.00159687	1.92075
	508-DISASSPNLGGILK-521	[6] Phospho (ST)	Ale1	Y	334	726.363	73.499	1.17567	2	0.000319889	20.4366	1.49598e+06	119715	599195	122455	1.40385e+06	184085	738133	104756
	184-SSLVSPVLEIPHESK-198	[2] Phospho (ST)	Alr1	Y	2238	851.428	71.8386	0.870717	2	0.000101917	40.5562	104517	42388.1	209147	24114	83072.9	300.874	566686	17482.1	17.64	0.00190159	1.11803
	355-SESTNETEIHEK-366	[3] Phospho (ST)	Alr1	Y	9575	742.303	34.5029	0.369833	2	0.00408999	99.9218	83.4571	83.3918	27961.2	27155.1	2836.66	459.607	11510.1	10643.4	17.49	0.0030569	2.06187
	175-SSPDAVDSVGK-185	[1] Phospho (ST);	Are2	Y	3801	1141.48	41.0696	0.594233	1	0.00732688	110.34	77869.8	85921.3	342562	166097	13008	10842.4	457746	240133	42.83	0.00307728	2.69825
	505-FLTSLAALVNSTSSQKYIVLTGNARMQQRPIAPLVDSLRANGTK-548	[3] Phospho (ST)|[4] Phospho (ST)|[11] Phospho (ST)|[26] Oxidation (M)|[37] Phospho (ST)|[43] Phospho (ST)	Aro1	N	1127	1287.36	100.355	1.83608	4	0.00372977	34.8535	3.45865e+06	296777	2.02511e+06	256450	1.52121e+06	530195	2.5019e+06	191431	23.29	0.0120878	2.34925
	545-LASMVKDSVKYQETDPHTASINLKK-569	[3] Phospho (ST)|[4] Oxidation (M)|[8] Phospho (ST)|[11] Phospho (Y)|[18] Phospho (ST)	Atg20	N	2308	1047.11	96.4497	1.29342	3	8.61009e-08	13.6502	1.25027e+06	170664	323805	22266	2.38774e+06	2376.66	316253	21332.1	16.02	-0.00138114	0.44009
	121-LAASELSDSIIDLGEDNHASENTPR-145	[7] Phospho (ST)	Atg33	Y	4125	912.08	74.9397	1.54087	3	0.000394785	26.7912	195983	25812.6	454124	121666	256656	34300.3	584401	44806.3	47.71	0.00607913	2.22417
	180-FTNNDMDSIVVK-191	[8] Phospho (ST)	Avt1	Y	3562	731.819	62.3626	0.311833	2	0.00103644	81.0383	30868.8	7571.11	122540	99304	5988.11	808.454	212392	74281.9	50.72	0.0022884	1.56566
	892-RSTTHDVGEISNNVK-906	[3] Phospho (ST)|[4] Phospho (ST)	Bbc1	Y	2035	908.887	46.4832	1.59693	2	0.00116617	36.4458	671249	244642	293701	33583.6	300158	90833.3	122904	40517.2	37.99	0.00404221	2.22619
	892-RSTTHDVGEISNNVK-906	[2] Phospho (ST)|[3] Phospho (ST)	Bbc1	Y	1880	606.26	46.4367	1.64003	3	0.00936491	55.5623	422887	158587	141312	78516	170195	43314	67550.2	27322.7	40.63	0.00373958	2.05952
	58-NIVLFPEPEESFSRPQSAQSQSR-80	[17] Phospho (ST)	Bcy1	Y	848	905.094	78.7433	1.66162	3	1.44406e-06	19.8432	450358	89365.7	1.61525e+06	194914	389475	5138.71	2.63308e+06	262213	18.3	0.0066975	2.46935
	143-RTSVSGETLQPNNFDDWTPDHYK-165	[3] Phospho (ST)	Bcy1	Y	1351	929.741	71.0959	2.31245	3	0.000979842	21.1378	1.02777e+06	217247	1.28252e+06	33203.8	685818	107800	1.62417e+06	36627.7	31.64	0.00431084	1.54721
	418-WADRPNLDDYDSDEDSR-434	[12] Phospho (ST)	Bdf1	Y	2368	716.944	57.2118	1.14413	3	2.0455e-06	40.8217	239066	84401.1	281904	115078	3520.41	170.125	325214	55815.5	21.05	0.00335467	1.5619
	456-KLSDLSLSGSK-466	[3] Phospho (ST)	Bem1	Y	7444	607.806	56.2126	0.2842	2	1.5042e-07	64.0502	49641.6	19094.1	9870.1	3866.65	0	0	2269.03	1453.32	37.7	0.00209971	1.73015
	576-DESDIEEDVDDDFFRK-591	[3] Phospho (ST)	Bms1	Y	16040	786.317	83.69	0.351367	4	0.56669	166.651	42220.4	70360.7	3411.83	2986.14	146.748	207.533	1307.92	2078.81	18.14	0.00136039	0.433074
	461-IYGKPVQEEDADIDNLPSDEEPYTNDDDVQDSEPR-495	[18] Phospho (ST)	Bms1	Y	2158	1363.24	63.5661	0.9873	3	9.42637e-06	23.5477	757449	178362	2.1477e+06	243031	687940	135474	261790	30447.5	58.51	0.00633594	1.55038
	30-NLLSSSDSRRNSQDEDSLPNNTNLIK-55	[8] Phospho (ST)|[12] Phospho (ST);	Bsc6	Y	554	1026.46	66.7257	2.19062	3	0.00242827	18.701	2.98575e+06	558365	3.81241e+06	447223	1.71046e+06	202219	3.22057e+06	263153	29.82	0.00494723	1.60815
	136-DIVADKPILGFNAFAALESEDEDDEA-161	[19] Phospho (ST)	Caf20	Y	340	958.761	96.2796	3.75753	3	0.000476047	22.0123	5.38388e+06	597823	4.05299e+06	892158	6.18583e+06	398396	2.31937e+06	247928	47.12	0.00683788	2.37984
	253-SSEASSFTQNEEAISSLCDVESKDTR-278	[15] Phospho (ST)	Caf4	N	2127	967.408	105.907	14.9997	3	0.00170395	12.5288	3.45551e+06	221172	2.84684e+06	321214	3.59788e+06	40409	2.16036e+06	270667	21.03	-0.00403007	1.39006
	45-HDNLSSSSSDIIYGR-59	[5] Phospho (ST)|[7] Phospho (ST) [8]Phospho (ST) [9] Phospho (ST)	Ccc1	Y	2708	905.858	57.626	0.7158	2	9.72334e-05	25.7374	436866	98824.2	273221	59487.8	64995.9	16728.2	215066	16977	28.47	0.00349464	1.93106
	60-NSAQDLENSPMSVGK-74	[9] Phospho (ST)|[12] Phospho (ST)	Ccc1	Y	2131	868.835	52.0536	1.27478	2	0.000180627	36.5234	529816	193507	600698	186942	55063.3	18783.9	501358	104993	53.13	0.00312809	1.80226
	76-NEDNDYSDWEDDEDTATEFVQEVEPLIDFPELHQK-110	[7] Phospho (ST)[15] Phospho (ST)	Cdc123	N	1778	1457.92	101.562	0.8631	3	3.36347e-05	27.6308	1.42821e+06	203329	1.87164e+06	166523	286535	26646.4	910194	251494	63.32	0.00756406	1.73062
	20-RTSIIGTIGPK-30	[3] Phospho (ST)	Cdc19	Y	1237	611.832	57.4957	0.5237	2	0.0013816	173.205	220.127	381.27	147553	44287.4	19.2709	27.2531	448473	146573	37.63	0.00210041	1.71932
	5-EEQVSIKQDPEQEER-19	[5] Phospho (ST)	Cdc3	Y	936	962.422	44.9759	0.786517	2	0.000151501	53.5079	302507	107183	881595	254610	33998	18191.6	753968	285205	35.16	0.00345714	1.79795
	251-IEFEDDDDDDDDSIDNDSVMDR-272	[13] Phospho (ST)	Cdc34	Y	3432	1335.47	65.0587	0.804133	2	0.00126263	30.8392	468890	130147	640479	146650	135584	41812.9	296880	59560.5	82.11	0.00563592	2.11169
	44-RASSIFSINTTPLAPPNATDIQK-66	[3] Phospho (ST)|[6] Phospho (ST)	Cho1	Y	1011	1223.57	80.3472	1.00708	2	8.33238e-05	20.0618	629891	111292	1.64186e+06	329386	719594	104764	2.33411e+06	280609	16.59	0.00195943	0.801362
	2-VESDEDFAPQEFPHTDTDVIVNEHR-26	[3] Phospho (ST)	Cho1	Y	518	752.326	68.5738	1.43862	4	0.000222237	23.8499	780769	130788	2.06297e+06	262252	1.6071e+06	232928	3.30887e+06	789163	37.3	0.0040403	1.3444
	315-DDFSRDDEYDDLNTIDK-331	[4] Phospho (ST)[9] Phospho (Y)|[14] Phospho (ST)	Chs1	Y	1770	1078.42	64.1056	1.01087	2	0.00453195	49.0411	1.06451e+06	202567	372113	67474.9	1.10641e+06	191900	325471	159614	40.51	0.00435328	2.02025
	18-NEPSYELQNAHSGLFHSSNEELTNR-42	[17] Phospho (ST)|[18] Phospho (ST)	Chs1	Y	4138	1011.75	66.3645	1.14077	3	0.000199601	37.0401	1.02721e+06	80283.4	235900	68125.1	592966	2047.09	183935	68129.6	19.82	0.00242903	0.80107
	137-DGDVDNFEESSTQPINK-153	[11] Phospho (ST)	Chs3	Y	1187	987.903	52.957	1.10345	2	0.00908662	22.86	1.18722e+06	186173	575677	91758.7	800542	51708.3	744080	170097	41.4	0.00318997	1.61616
	569-DATESVAVEPSNEDVKPEEKGSEAEDDINNVSK-601	[22] Phospho (ST)	Chs5	Y	1752	1204.53	56.1692	1.08738	3	0.0105983	33.2074	1.17497e+06	390178	935064	260190	580935	130129	427932	72947.6	45.03	0.00667239	1.84802
	351-NMYSLGDDGDNDIEENSLNESLLDGVTHSLDDLR-384	[17] Phospho (ST)	Cmk2	Y	451	1282.55	95.722	1.26422	3	0.000344275	11.7883	6.67264e+06	448725	5.01738e+06	103905	4.46824e+06	399248	3.73279e+06	440031	150.83	0.0104549	2.71935
	2777-EELDEEVGASIAIDDYMHYASKIVGGTIIDIPKLAVHMTTLQEEKTNNLEYLFACSFSDK-2836	[10] Phospho (ST)|[17] Oxidation (M)|[19] Phospho (Y)|[21] Phospho (ST)|[38] Oxidation (M)|[39] Phospho (ST)|[40] Phospho (ST)|[46] Phospho (ST)|[51] Phospho (Y)|[55] Carbamidomethyl (C)|[56] Phospho (ST)|[58] Phospho (ST)	Csf1	N	9024	1503.6	109.988	0.79195	5	0.00176218	36.1177	590810	35493.6	249998	37610.2	431478	155840	294098	17576.5	15.07	0.0225616	3.00302
	1017-SQSVISAESILFTLIDFENEKYSQR-1041	[13] Phospho (ST)	Csf1	N	2458	746.852	60.0205	0.822933	4	5.27153e-07	23.7926	544690	129596	63943.8	9403.75	733217	170365	29198.9	3959.47	29.07	-0.0437541	14.6657
	555-FGSDTDDDDIDLKPVEGGKDPDNQSLPNSEK-585	[3] Phospho (ST)|[5] Phospho (ST)	Cst6	Y	3518	1169.82	63.7227	0.7429	3	0.000350292	44.7299	419775	50016.5	427594	39051.3	123329	55164.8	119665	33591.5	20.15	0.00833355	2.37665
	572-SRDNSFRGGSGWGSDSK-588	[1] Phospho (ST)|[5] Phospho (ST)	Ded1	Y	2136	980.375	47.5831	1.5045	2	3.33897e-06	42.8944	80562.5	6523.24	1.04225e+06	225313	35450.9	15206.4	1.16585e+06	371689	31.26	0.00382191	1.95122
	136-DVPEPITEFTSPPLDGLLLENIK-158	[11] Phospho (ST)	Ded1	N	6264	1309.16	101.106	0.8393	2	0.00213066	34.3844	111817	31505.5	322400	107602	129498	35041.9	551665	189687	37.47	0.00712758	2.7243
	2-GSINNNFNTNNNSNTDLDRDWK-23	[13] Phospho (ST)	Dhh1	Y	8190	1317.06	61.5222	0.635483	2	0.00698669	55.9942	93963.9	52614.3	484716	220934	32990.6	8270.68	163557	85498.9	30.73	0.00690659	2.62399
	172-VWDEYGEGGSSEDDDGEDDFEASFGSMPKPTDNEEK-207	[10] Phospho (ST)|[11] Phospho (ST)	Dhr1	Y	3976	1377.5	78.0896	1.14752	3	0.000608751	25.6377	1.10847e+06	174724	806502	117740	970755	248879	385422	53927.4	52.44	0.0152431	3.69129
	67-DDSFAVPDGKDENTR-81	[3] Phospho (ST)	Dip5	Y	768	873.356	51.5263	1.10218	2	0.00181543	96.0842	336126	72001.5	1.48195e+06	78100.5	104293	100210	451192	123846	36.45	0.00420901	2.41246
	16-NSSSLDSDHDAYYSK-30	[7] Phospho (ST)	Dip5	Y	1694	884.84	44.7522	0.851933	2	0.00381626	31.131	587746	147598	230075	14036.7	450947	66132.7	247948	77188.4	37.19	0.00385609	2.18146
	276-IPDEELHPLSDEGM-289	[10] Phospho (ST)	Dpp1	Y	632	839.341	61.3299	1.50605	2	0.053306	30.9592	1.49962e+06	464272	911183	245227	1.73037e+06	217093	1.70374e+06	383872	28.28	0.00357796	2.13398
	198-VVDDLIEDSDDDDFSSDSSK-217	[9] Phospho (ST)	Dre2	Y	7534	1141.94	64.8286	0.480383	2	0.000135839	27.1646	119174	32373.3	222108	39399.3	26540.3	2178.86	111653	30291.3	27.55	0.00596524	2.6142
	557-EQEEETNS*LVS*DSEK-571	[8] Phospho (ST)|[11] Phospho (ST)	Dur3	N	5736	942.348	46.2617	1.18733	2	0.00105486	61.7287	65900.9	39413.4	27715.1	2018.87	644249	202460	33656.6	20775.8	26.69	0.00531088	2.82092
	166-EEQEEEQDVPLSDVEFDSDADVVPHHK-192	[12] Phospho (ST)|[18] Phospho (ST)	Ebp2	Y	349	1094.77	68.2615	1.6528	3	8.4531e-05	13.8164	6.16114e+06	851251	3.58632e+06	379405	8.88064e+06	750463	7.33044e+06	264397	89.82	0.00667586	2.03452
	632-NDDSHDDLILLSAK-645	[4] Phospho (ST)	Ecm30	Y	3083	818.368	70.5308	0.497567	2	0.0036805	73.7874	66333.3	21813.6	289603	52054.3	33478.2	24702.7	153166	63875.9	44.36	0.00335647	2.05324
	923-FVETTVENSNLNVNR-937	[9] Phospho (ST)	Ede1	Y	4357	908.419	56.6802	0.953183	2	0.000799143	65.765	37162.8	24440.1	255891	43597.1	46757.4	11282.4	230060	24987.1	43.27	0.00306522	1.689
	93-SSNYDSSDEESDEEDGKK-110	[6] Phospho (ST)|[7] Phospho (ST)|[11] Phospho (ST)	Eif3c	Y	22167	1130.84	30.5352	1.23157	2	0.00181529	141.421	133591	57594.2	52260.1	24661.7	78.0765	110.417	19438.8	11978.2	38.94	0.00565474	2.50247
	171-NFDTDESLLTGESLPVSK-188	[7] Phospho (ST)	Ena5	Y	3713	1016.46	74.8229	0.820867	2	2.98194e-05	31.235	109988	18893.4	412886	71881.9	109932	34337.2	608032	99828	44.15	0.00244033	1.2016
	523-SVESDLHEHSPDNLYDLAAR-542	[10] Phospho (ST)	Esc1	Y	6291	783.347	67.576	0.643033	3	0.00387992	96.1502	14933.8	14358.8	133555	36628.3	12728.3	9258.98	231852	133721	31.28	0.00605609	2.58034
	306-DESQGAEGTEHSVDFSK-322	[3] Phospho (ST)	Esc1	Y	4951	951.875	47.5831	0.739983	2	0.00502605	83.9538	144159	24796.5	165732	22581	27510.5	23096.1	200648	91391.8	24.55	0.00470699	2.47511
	202-DFDLENDEYELSEEEK-217	[12] Phospho (ST)	Esc1	Y	965	1042.4	70.0585	1.21375	2	0.00202725	20.3224	617788	45211.1	1.05238e+06	213868	1.18659e+06	67993.8	1.16863e+06	160064	32.34	0.00571757	2.74516
	170-MWLEQHPDGVTNEYQGPRSDDEDDEDSE-197	[19] Phospho (ST)|[27] Phospho (ST)	Fap7	Y	2631	1151.75	65.8087	0.777517	3	0.00659888	82.6104	431424	110464	846408	260631	114558	94637.2	633489	184120	38.83	0.00825722	2.39185
	17-RSPVIGSSLENEK-29	[2] Phospho (ST)|[7] Phospho (ST)|[8] Phospho (ST)	Fcy2	Y	2783	828.329	51.5925	0.772233	2	0.000101526	49.9899	462448	146303	43811.8	7814.43	25852.9	9016.77	51000.7	25495.2	22.53	0.00335432	2.02722
	593-VIRDLHVDPEVLLNEVDENEERQVNEDRHSTEK-625	[30] Phospho (ST)	Fet3	Y	5489	807.989	90.3397	1.13063	5	0.00105149	119.539	7945.89	9498.43	11713.6	7211.92	1.16411e+06	420286	12080.3	2064.39	19.1	0.00965328	2.39245
	640-SEDNLFGVEYDDEK-653	[1] Phospho (ST)	Flc1	Y	2292	870.34	72.1588	0.93935	2	5.19057e-08	16.6076	196838	22451.3	88485.7	4917.98	1.40386e+06	233148	336472	14475.5	57.25	0.00425863	2.44938
	2502-IEFSEDISSDFNEMLK-2517	[9] Phospho (ST)	Fmp27	N	2680	992.421	92.3481	0.660667	2	0.00130384	23.4967	220716	15549.8	245740	57740.8	192577	26243.2	451309	13236.6	37.92	0.00508921	2.56665
	231-LIEGDTGSGIIPDEQERQSLIAIER-255	[8] Phospho (ST)|[19] Phospho (ST)	Fmp42	Y	1808	967.124	74.4849	1.01453	3	4.2238e-08	20.0682	111644	22405	1.03519e+06	105581	58931.2	3031.66	1.35038e+06	71035.4	15.09	0.00746017	2.57394
	269-SVLETYVEDK-278	[1] Phospho (ST)	Fmp42	Y	466	1262.56	59.4157	0.769017	1	0.00305088	92.2556	623271	350674	1.39761e+06	317170	171764	158462	2.51378e+06	713264	32.36	0.00229021	1.8154
	57-RNPDFEDDDFLGGDFDEDEIDEESSEEEEEEK-88	[24] Phospho (ST)|[25] Phospho (ST)	Fpr3	Y	80	1323.81	81.3781	4.98873	3	0.00120148	14.2393	3.23023e+07	3.13342e+06	3.73445e+07	5.31758e+06	1.93127e+07	489904	3.38082e+07	2.57099e+06	93.49	0.0103263	2.60213
	383-NNSSALINSPLNFLIK-398	[3] Phospho (ST)	Fre8	N	2533	912.969	98.2447	0.839683	2	7.75027e-07	30.6141	30361.5	9294.89	387118	10232.4	35217.7	2527.65	586336	132155	43.56	0.00495008	2.71398
	52-KDTDSENNITIAQDDEK-68	[5] Phospho (ST)	FUI1	Y	8950	1008.43	46.5292	0.91645	2	4.64323e-05	50.2653	59921.4	18528	4365.78	2194.47	240065	65941.3	10685	4223.05	40.15	0.00506043	2.51158
	12-KPILAVPEPALADTHSEEISR-32	[14] Phospho (ST); [20] Phospho (ST)	Fun26	Y	2880	785.066	69.2956	0.8957	3	0.00187307	110.538	184512	83092.4	277554	213838	8305.4	4566.61	343688	379905	60.15	0.00466094	1.98155
	56-EQSVSTEPLDTLPLR-70	[3] Phospho (ST)|[6] Phospho (ST)	Fun26	Y	976	922.91	75.855	1.50945	2	0.000406863	16.0045	1.12836e+06	106557	1.49296e+06	602162	668281	106955	1.36867e+06	191690	32.53	0.00432047	2.34324
	493-EINTLSNQLDELYLSDDSISSATKK-517	[15] Phospho (ST)|[18] Phospho (ST)|[20] Phospho (ST)	Gcd6	Y	1174	1008.77	78.323	1.33288	3	0.00600955	25.3393	1.6275e+06	186683	1.71973e+06	131711	1.18348e+06	25767.9	780519	105954	20.35	0.00677549	2.24111
	32-FTSQSGVAALLGGGSEIFSNQDDYLAHTFNNLNTNK-67	[15] Phospho (ST)	Gea2	Y	1611	1304.27	94.8449	0.883617	3	6.28774e-06	18.6652	710718	132657	1.05115e+06	690824	326523	14663.4	1.15698e+06	53587.8	52.43	0.00746855	1.91022
	123-SSYITVDGIK-132	[2] Phospho (ST)|[5] Phospho (ST); [3] Phospho (ST)|[6] Phospho (ST)	GNP1	Y	230	621.758	62.8096	1.46952	2	0.00567013	45.1623	1.1311e+06	192925	393166	398847	1.19969e+06	37814.7	1.88847e+06	304424	32.84	0.0023977	1.9313
	86-RAEGSHANSPDSSNSNGTTPISTKDSSSQLDNELNRK-122	[26] Phospho (ST)[27] Phospho (ST)|[28] Phospho (ST)	Gnp1	Y	586	1016.19	53.42	3.12978	4	3.05371e-05	16.4742	7.42011e+06	1.2224e+06	1.56988e+06	1.35356e+06	5.13893e+06	392117	3.30455e+06	396882	60.83	0.00640556	1.57744
	23-NDLDDVSHYEMK-34	[7] Phospho (ST)	Gnp1	Y	321	773.302	59.2271	1.44078	2	2.55465e-05	27.1042	634379	171943	1.46977e+06	1.14545e+06	448737	71482.2	2.97419e+06	489407	52.49	0.00367609	2.37998
	70-SDSAVSIVHLK-80	[3] Phospho (ST)|[6] Phospho (ST)	Gpd2	Y	228	658.29	63.5881	1.11998	2	0.00179606	22.9358	1.34498e+06	231960	560925	290908	1.76551e+06	167863	660169	151415	59.46	0.00240602	1.83028
	666-VNSRGSLTDIPIFSDAK-682	[3] Phospho (ST)|[6] Phospho (ST)	Gpt2	Y	442	660.635	80.6631	1.48607	3	0.015656	42.5121	896106	110242	746791	793274	339045	4468.6	856159	154399	33.9	0.00445799	2.25278
	688-SEGETSEDEDEFDEK-702	[5] Phospho (ST)|[6] Phospho (ST)	Gpt2	Y	5468	953.3	47.4428	0.785233	2	0.0015228	53.7669	308884	166077	158338	154560	22922.6	3776.73	174676	51084.7	15.06	0.00884666	4.64495
	147-ESDDLDDVSLNHDER-161	[9] Phospho (ST)	Grh1	Y	565	919.859	52.9788	1.0378	2	1.49103e-05	31.1888	360924	70380	1.36759e+06	1.02821e+06	236917	73891.3	1.28707e+06	240732	19.33	0.00384456	2.09205
	115-LPDWLDEEESEGERNGEEANDEK-137	[10] Phospho (ST)	Hbs1	Y	1053	924.04	70.9808	1.79277	3	1.02551e-07	15.1858	1.42075e+06	147702	1.76422e+06	1.08881e+06	204997	31130.4	1.56771e+06	112580	31.94	0.00640932	2.31459
	568-SLSSAQSSSSGPSSSSEEDDSRDIESLDK-596	[13] Phospho (ST)|[14] Phospho (ST)	Hmg1	Y	8536	1045.41	57.8436	0.497567	3	5.12979e-05	27.61	163067	41366.3	68677.4	6569.31	587658	162252	72575.7	11947.5	17.34	0.00604141	1.92818
	543-EFSVAASDVELENEHVPWGK-562	[7] Phospho (ST)	Hnm1	Y	599	1162.02	76.7147	2.28492	2	1.69434e-05	15.5537	1.90606e+06	173569	1.96097e+06	1.57467e+06	1.03731e+06	57258.6	4.93573e+06	705356	26.13	0.0058323	2.51174
	30-VEEEIKPLDDMDSK-43	[13] Phospho (ST)	HNM1	Y	131	864.378	59.2693	1.44115	2	0.00481744	23.3447	3.79828e+06	886698	1.84138e+06	1.5343e+06	2.19727e+06	504171	5.41518e+06	1.00923e+06	59.38	0.00369344	2.13897
	329-KGESTPPHPPENLSSSFYEK-348	[14] Phospho (ST); [5] Phospho (ST)	HOM3	Y	922	1156.02	61.2648	2.36433	2	4.49965e-05	39.688	591859	234897	1.60392e+06	1.42772e+06	428112	85149.4	5.62289e+06	1.09339e+06	27.41	0.00325421	1.40874
	303-EAVPESPRASGETAIHEPEPEAEQAVEDTA-332	[6] Phospho (ST)|[10] Phospho (ST)|[13] Phospho (ST)	Hsp30	Y	1138	1180.99	61.3717	1.03537	2	3.17182e-05	43.6964	330417	144381	3.36198e+06	2.41301e+06	152365	49884.2	1.06493e+06	245380	55.03	0.00421573	1.78635
	213-SSSFAHLQAPSPIPDPLQVSKPETR-247	[3] Phospho (ST)	Hsp42	Y	3415	923.794	76.4814	0.793483	3	6.51452e-06	39.7131	11369.1	2869.84	118368	48942.1	23554.4	5500.07	549516	93878.4	31.19	0.00587902	2.12365
	36-NESFHDNLSESQVQPAVAPPNTGK-59	[9] Phospho (ST)	Hxt1	Y	143	1323.6	58.5355	3.02143	2	0.000951816	51.5806	4.07316e+06	2.10096e+06	8.55657e+06	7.35898e+06	1.75089e+06	844955	2.01647e+07	6.26869e+06	66.81	0.00353433	1.33614
	13-SNSSNSYELESGR-25	[1] Phospho (ST)|[4] Phospho (ST)|[7] Phospho (Y)	Hxt1	Y	4261	835.264	44.3988	1.56245	2	0.0013568	84.3871	28312.4	18334.5	1.13685e+06	894226	9526.01	3034.73	521716	272580	26.55	0.00365908	2.19302
	36-GVQDDFQAEADQVLTNPNTGK-56	[15] Phospho (ST)	HXT3	Y	4316	1164.02	67.8963	0.754783	2	2.28298e-05	82.5477	30939.5	7944.66	534965	442358	3541.16	2923.14	70290.8	20303.4	56.41	0.00604213	2.59764
	163-SSFSGASSNEPTNSPGDFLNQSR-185	[4] Phospho (ST)	Ids2	Y	5091	1233.51	65.126	0.729517	2	0.00294861	89.78	143528	10734.6	202284	174916	51588.2	46315.9	392228	85436.7	46.56	-0.00342859	1.3909
	115-TNFRSSSIYPPGTVYAVTYTESCLLHALLMLFSESMMEAAK-155	[13] Phospho (ST)|[15] Phospho (Y)|[18] Phospho (ST)|[19] Phospho (Y)|[20] Phospho (ST)|[22] Phospho (ST)|[23] Carbamidomethyl (C)|[37] Oxidation (M)	Iml2	N	2446	1704.69	83.1745	2.25137	3	0.00693628	29.4869	4.53025e+06	319512	3.3715e+06	3.00069e+06	3.16884e+06	84784.1	2.35563e+06	263201	28.33	0.0555868	10.8759
	378-SRTNDSSLLPGYMDSATLLHPGK-400	[3] Phospho (ST)|[6] Phospho (ST)|[13] Oxidation (M)	Iml2	Y	1198	879.389	72.5075	1.003	3	0.000587113	48.9331	954544	43716.4	589666	500999	494368	241910	252442	52472.2	28.18	0.00641185	2.43321
	648-AVQESDSTTSRIIEEHESPIDAEK-671	[7] Phospho (ST)|[9] Phospho (ST)[10] Phospho (ST)[5] Phospho (ST)||[8] Phospho (ST)	INA1	Y	259	944.407	61.2233	2.33392	3	5.05219e-06	29.4037	6.36918e+06	1.87278e+06	403588	324823	7.43522e+06	1.40688e+06	1.61979e+06	310746	37.51	0.00462187	1.54571
	828-DANIKPVVNAAVNDNQSKVSVATEQTK-854	[17] Phospho (ST)|[20] Phospho (ST)	Ist2	Y	7501	1000.81	57.0552	0.658517	3	0.000549438	72.0444	24456.8	10689	223453	173361	13469.8	5495.17	18391.8	13250.3	15.55	0.00394555	1.31545
	817-VTSYDITGDIRNEGSDAEEEEGEYK-841	[15] Phospho (ST)	ISW2	Y	5404	962.734	63.7227	0.631967	3	0.0034342	55.4276	289073	40676.1	42223.5	27296.3	201109	111470	147082	50242.1	35.6	0.00405677	1.40607
	42-ITLESHEIQR-51	[5] Phospho (ST)	ITR1	Y	358	653.315	52.4903	0.8844	2	1.90717e-05	37.3904	52637	15164.6	371012	341418	74467.8	21086.6	1.39358e+06	521066	35.81	0.0024775	1.89903
	12-TSQSNVGDAVGNADSVEFNSEHDSPSKR-39	[4] Phospho (ST)|[15] Phospho (ST)	Itr1	Y	5977	1032.09	53.9894	0.87195	3	0.00173674	99.6149	45656.7	472.092	308458	263140	56622.5	56404.5	41227.2	13896.4	26.62	0.00435411	1.40762
	984-KTSITETYGDDK-995	[3] Phospho (ST)	Kin1	Y	8140	719.312	41.7782	0.648833	2	0.00526104	85.4901	47224.5	11767.6	237819	326407	8379.92	7164	75057.2	22039.9	28.22	0.00232036	1.61517
	149-NESEILER-156	[3] Phospho (ST)	Kin2	Y	5708	535.233	50.9051	0.237983	2	1.44045e-06	94.4127	4265.06	2066.76	28201.1	26625.4	0	0	46362.8	24641	35.33	0.00173247	1.62148
	484-EVSPESFGLTAR-495	[3] Phospho (ST)	KRI1	Y	257	686.812	66.6329	1.34133	2	6.52246e-05	28.7118	326363	72415.7	772146	688469	403104	98988.7	2.78733e+06	800292	53.43	0.00291181	2.12292
	21-RNSSVGKIDLGDTVPGFAAMPESAASK-47	[3] Phospho (ST)|[4] Phospho (ST)	Lag1	Y	6072	955.771	77.6212	0.34775	3	0.0044616	102.645	8354.55	2590.18	88925.4	58359	5363.06	5504.92	17586.5	6958.75	27.52	0.00881393	3.07719
	14-ARTLSNPNDFQEPNYLLDPGNHPSDHFR-41	[3] Phospho (ST)|[5] Phospho (ST)	Lcb3	Y	1596	853.622	72.5525	1.84805	4	6.57228e-05	41.7909	345142	144238	1.57852e+06	895591	100765	36302	1.53213e+06	280616	17.64	0.00761261	2.23214
	483-DQDQSSPKVEVTSEDEK-499	[6] Phospho (ST)|[13] Phospho (ST)[5] Phospho (ST)	LEU1	Y	1648	1000.92	42.1968	1.0315	2	1.23064e-05	36.6843	74315.2	23435.4	596094	554204	12416.2	4010.21	429858	157690	59.41	0.00421415	2.10726
	295-LAPTNSGGSGGKLDDPSGASSYYASHR-321	[6] Phospho (ST)|[9] Phospho (ST)	Lsb3	Y	1111	938.06	53.8986	1.11708	3	0.000175606	79.528	245395	43028.5	1.11511e+06	942782	113519	90279.7	112336	24217.6	40.83	0.00515109	1.83237
	83-LQVVSHETDINEDEEEAHYEDK-104	[5] Phospho (ST)|[8] Phospho (ST)	Lyp1	Y	1296	930.369	55.6834	1.29558	3	0.00523675	30.9848	1.20301e+06	372750	356602	267339	327414	86049.8	532199	126661	36.65	0.00549102	1.96946
	389-NFHAEVSTPQVLSAK-403	[8] Phospho (ST)	Lys20	Y	30	854.41	61.1405	3.01145	2	0.000852243	33.6822	9.01183e+06	3.03539e+06	1.39721e+07	1.2118e+07	9.44103e+06	1.45491e+06	3.12794e+07	6.19895e+06	85.82	0.00295778	1.73294
	403-DFHAELSTPLLKPVNK-418	[8] Phospho (ST)	Lys21	Y	279	944.984	69.205	1.50597	2	0.0036727	100.28	701645	703608	537541	517999	1.92345e+07	2.6718e+06	294726	191626	83.85	0.00442494	2.34378
	209-SSINERPSNLSLGPFGPINEPSSR-232	[8] Phospho (ST)	Maf1	Y	14656	879.091	76.9241	0.207517	3	0.00346871	67.2042	6112.41	4107.79	88036.7	86526	7319.73	1599.29	121498	24823	30.94	0.0071568	2.71683
	418-KRDAETADIGDQSEVESDTEELK-440	[13] Phospho (ST)|[17] Phospho (ST)	Mak11	Y	2409	909.044	57.9714	0.714383	3	0.00119206	32.6689	739440	241567	131836	126697	695017	131189	266287	45125.1	17.51	0.0052025	1.9098
	873-ASNFDSDDEMDENEIWSALVK-893	[6] Phospho (ST)	Mak21	Y	685	832.339	92.0075	1.1983	3	0.0010096	21.6302	1.13834e+06	240010	498137	450754	382636	6195.99	551839	64209.3	55.53	0.00661151	2.65098
	68-LIQGLSDDDDAKSEQEFDAVADEDADDK-95	[6] Phospho (ST)|[13] Phospho (ST)	Mak21	Y	461	1072.09	67.4373	1.62482	3	1.46506e-07	18.3421	3.4722e+06	591739	3.18322e+06	583869	97696.7	15978.9	1.23071e+06	32749.7	33.53	0.00684005	2.1287
	134-LTDPSEDVDEDVDEDVLK-151	[5] Phospho (ST)	Mak5	Y	4675	1056.94	68.3727	0.680433	2	0.00178894	33.2275	182078	60500.1	338045	276478	240748	44112.5	744188	222976	44.14	0.00677746	3.20923
	427-AADQADESSPLLSPSNSNHPSEHPQQDLNNK-457	[13] Phospho (ST)	Mam3	Y	4449	1136.5	52.599	0.946733	3	0.00501285	109.691	706236	193726	176538	176039	377240	413799	55722	17052.2	27.55	0.0039254	1.15234
	73-VLNTPEASLIYDDDREFPDGGLK-95	[4] Phospho (ST)|[8] Phospho (ST)	Mch4	N	2431	908.734	76.7147	0.9807	3	4.46209e-05	23.524	289409	62806.1	225234	176472	222260	52284.5	1.10188e+06	69548	47.33	0.00224144	0.823099
	189-KLEHNQPSISYICSR-203	[10] Phospho (ST)|[13] Carbamidomethyl (C)[11] Phospho (Y)	Mck1	Y	635	637.965	53.6615	3.38993	3	0.00165278	38.7739	1.08228e+06	172406	928501	417072	426505	15671	2.26772e+06	566743	53.63	0.00309841	1.62146
	157-QYEDLENSDDDLLSDMDIDPLREELTLESLSNVK-190	[8] Phospho (ST) [14]Phospho (ST)	Mcm2	Y	1943	1345.28	99.7482	1.01917	3	0.00226356	38.7867	873989	193760	1.58243e+06	663435	491672	190703	1.31057e+06	103605	52.22	0.0145133	3.59881
	4546-MDIDEEEMLSDIDAHDANNDVDSK-4569	[10] Phospho (ST)	Mdn1	Y	4204	939.698	70.2384	0.495333	3	0.000729586	52.6641	324676	28311.5	198419	148949	481579	91364.4	80387.8	17915.4	31.05	0.00487106	1.72974
	432-DYYLWGVDEDSQRSDVNHR-450	[11] Phospho (ST)|[14] Phospho (ST)	Mep1	Y	2467	838.665	73.8087	1.34978	3	0.000827358	29.8297	423230	107618	329205	79898.4	69408	20704.2	335403	97346.1	23.87	0.00440245	1.75189
	459-TSAQMPPPHENIDDK-473	[2] Phospho (ST)	Mep2	Y	3360	880.373	45.565	2.13083	2	0.00629256	37.8914	575577	122643	165773	147520	496200	134075	884537	335163	22.2	0.00339914	1.93272
	425-LSADEEELGTDAAQIGEFTYEESTAYIPEPIRSK-458	[33] Phospho (ST)	Mep2	Y	1080	1280.59	93.2669	0.711017	3	0.000700507	88.4304	588603	96140.9	1.36577e+06	1.20084e+06	466945	412921	4.93022e+06	565362	70.16	0.00490414	1.27754
	562-KYSDNEDDEYDDADLHGFEK-581	[3] Phospho (ST)	Met4	Y	3553	828.985	59.1409	1.44112	3	0.000170353	30.853	238405	31966.9	298974	230434	140734	43420.7	575053	79155.9	32.96	0.0050627	2.03818
	321-DIAAALSCKITSVEWMVMADMPPGQILLSQANLGSLFYLQAEK-363	[7] Phospho (ST)|[8] Carbamidomethyl (C)|[12] Phospho (ST)|[16] Oxidation (M)|[29] Phospho (ST)|[35] Phospho (ST)|[38] Phospho (Y)	Mgr3	Y	4976	1026.05	95.1866	1.66495	5	0.000206696	38.6097	1.64406e+06	229929	352640	293202	321427	124102	405850	88328.6	17.11	0.00713918	1.39296
	324-IRDSDSVLPNANTADHNNTNSGGEPINSSVASNDIIEEK-362	[4] Phospho (ST)|[6] Phospho (ST)	Mid2	Y	2538	1418.96	64.7374	1.34097	3	0.00076465	50.5725	778359	134744	1.63888e+06	1.29433e+06	374891	189592	1.14732e+06	242891	61.07	0.00561139	1.31913
	146-SLVSDLSPSELESWLK-161	[7] Phospho (ST)	Mnr2	Y	2542	935.449	98.3414	0.94075	2	0.00057577	22.1905	638916	97616.4	189812	56879.7	618598	137270	264122	47764.8	56.35	0.00261588	1.3997
	209-DEAPNLVIENESDDEYSALNR-229	[12] Phospho (ST)	Mrd1	Y	1669	1237.03	69.1583	1.3234	2	0.00767866	22.2607	1.24679e+06	88901.5	698724	457289	1.82737e+06	269322	962231	173317	63	0.00455611	1.84306
	332-LRSSPSASSSSLANR-346	[3] Phospho (ST)|[11] Phospho (ST)	Mrl1	Y	2465	840.363	41.0696	0.756283	2	0.00427118	82.8592	178961	60828.9	438269	412325	21087	17472.5	195588	84159.5	18.8	0.00333567	1.98705
	536-RDSAPDNQGIYHTVISK-552	[3] Phospho (ST)	Msb1	Y	1557	660.978	55.6375	0.771533	3	2.58826e-05	112.469	188747	56510.3	399664	110013	867.861	976.07	606204	166688	37.7	0.00297851	1.50436
	1201-MRLESDDEEANEDEEEDDW-1219	[5] Phospho (ST)	Myo5	Y	5535	1218.42	65.355	1.08242	2	2.09539e-05	28.4426	708994	112028	225688	177461	160487	45646.6	135708	4632.54	29.74	0.00722742	2.96835
	11-SSMQIDNAPTPHNTPASVLNPSYLK-35	[10] Phospho (ST)|[14] Phospho (ST)	Nap1	Y	2046	948.091	72.6877	1.0152	3	0.000879511	24.7259	577565	21903.2	194847	169247	480021	118689	217659	30414.2	36.46	0.00731489	2.57454
	394-DNGLLDESPNRLR-406	[8] Phospho (ST)	Ndc1	Y	2003	789.869	59.5217	0.5995	2	0.000375003	34.0867	246223	83929.3	284871	240726	53806.5	15057.4	179729	48842.1	24.69	0.00264044	1.67358
	1184-GTPKPVDTDDEED-1196	[8] Phospho (ST)	New1	Y	195	749.287	37.866	2.34233	2	0.00065775	30.8722	2.13451e+06	629928	970886	920611	2.33073e+06	468090	434090	120680	39.79	0.00376862	2.5182
	442-HLNTITLTK-450	[8] Phospho (ST)	Nha1	Y	6873	560.792	52.9788	0.24425	2	4.45844e-05	140.314	0	0	5587.68	8506.36	0	0	77381.2	69473.4	21	0.00123794	1.10573
	476-AGRSFSLHR-484	[4] Phospho (ST)|[6] Phospho (ST)	Nha1	Y	2287	595.748	46.0803	0.358283	2	2.1232e-05	115.846	10864.1	11541.1	141448	163862	0	0	171426	117309	16.04	0.0025743	2.16422
	546-NLPNNISTTGGNTFGGLNETENTSPNPARSSMDK-579	[31] Phospho (ST)	Nhx1	Y	3121	1205.87	66.4319	0.584883	3	0.00936959	76.1022	667362	507877	63926.7	58016.4	985143	414232	60875.4	24664	18.28	0.00674114	1.86498
	166-SEQMELEK-173	[1] Phospho (ST)	Noc2	Y	6388	1073.42	45.9686	0.2934	1	0.00209674	76.3766	48780.3	26011.3	198982	106023	4450.54	3399.17	254116	167978	29.13	0.00153236	1.42889
	134-DLLDFAGTNPLDGIDSQDEGEDAERNSNIEEK-165	[16] Phospho (ST)|[27] Phospho (ST)	Noc2	Y	1852	1196.19	87.8209	1.16192	3	5.62131e-06	27.7863	355226	96395.1	195065	133787	4.09148e+06	979850	204131	56720.4	100.24	0.00897776	2.50389
	229-SSAAASDNDSIDAISDLEEDANDGLVDRDEDEGVER-234	[10] Phospho (ST)|[15] Phospho (ST)[6] Phospho (ST)	Npa3	N	1260	1345.52	77.6212	1.5633	3	8.56853e-05	19.0929	2.64009e+06	309711	926738	799109	1.18968e+06	66502.1	809313	65043.7	77.89	0.0090641	2.2472
	261-NRSRSPPAPFSQPSTGR-277	[3] Phospho (ST)|[5] Phospho (ST)	Nrd1	Y	1084	667.962	49.7585	1.34262	3	0.00128339	31.4657	877790	276203	316492	286566	121007	10230.6	425629	133030	28.37	0.00351776	1.75812
	436-KWSVSAQWGGTSGQPLVTGIVFEEPDIIVGEGVSSKAISQKMPTDSGR-483	[5] Phospho (ST)|[11] Phospho (ST)|[12] Phospho (ST)|[18] Phospho (ST)	Nrd1	N	1402	1779.48	97.6715	1.29798	3	3.32335e-05	22.5891	1.60563e+06	264965	3.78244e+06	2.82397e+06	1.23866e+06	78693.5	4.45375e+06	1.00607e+06	20.1	0.00954394	1.7888
	2212-DNDDTSVASSIDLDHLSR-2229	[6] Phospho (ST)|[9] Phospho (ST)|[10] Phospho (ST)	Num1	Y	3937	733.936	64.5112	1.27312	3	0.0105378	120.094	182005	54376.1	191273	155689	21521.1	25845.5	156813	52567.9	23.58	0.00478322	2.1754
	654-TDGTFGTLSGKDDSIVEEK-672	[14] Phospho (ST)	Nup145	Y	2199	1039.96	61.2233	0.6329	2	0.000437902	29.5544	526324	155552	362354	160540	86527	4734.08	331393	89784.6	27.26	0.00482756	2.32328
	800-LPETPSDEDGEVVEEEAQK-818	[6] Phospho (ST)	Nup159	N	6250	1090.96	56.6126	0.7521	2	0.010102	54.7393	283222	155034	157024	54320.5	59341.1	25451.5	76591.8	3043.19	45.11	0.0035835	1.64388
	667-RPSQPLNTLSPK-678	[3] Phospho (ST)	NVJ2	Y	1393	709.364	52.3595	1.21273	2	0.00317214	59.2269	174078	63830.6	556665	332451	91863.8	54408	876429	375242	25.75	0.000731375	0.516248
	39-NIDEDVNNLTATTDEEDRDPESQK-62	[10] Phospho (ST)|[12] Phospho (ST)|[13] Phospho (ST)	Opt1	Y	6996	996.707	52.3595	0.919267	3	0.00227608	48.7278	366903	144818	95921.3	72499.3	84254.8	10076.7	41281.3	20115.4	16.24	0.00036101	0.120857
	1172-QIEDAQNESDEEETNGK-1188	[9] Phospho (ST)	Pan1	Y	17353	1008.39	36.2228	0.780383	2	0.000515205	69.2032	135862	41952.4	31822.5	26943.9	8050.74	5571.37	29045.9	11187.9	20.39	0.00427062	2.11966
	1271-GLDEDEDDGWSDEDESNNR-1289	[11] Phospho (ST)	Pan1	Y	9368	1138.89	53.1311	0.770367	2	2.09759e-05	57.0269	295507	41581.6	137252	19667.5	8206.21	639.638	54887.8	31300.8	35.04	0.00420784	1.84898
	48-DADSHSDNDHDSPDNVPSDVHLR-70	[6] Phospho (ST)	Pbp2	Y	2589	875.35	51.3932	1.20763	3	0.00511254	83.1188	289875	98456.6	578933	91407.8	98950.5	82246.5	681651	206844	26.3	0.00611438	2.33105
	344-EASPATEFANEFTGENSTAK-363	[3] Phospho (ST)	Pct1	Y	950	1090.96	73.0188	1.21012	2	0.00170134	30.351	1.97019e+06	195484	701131	429230	1.37647e+06	417771	866758	145416	47.26	0.00418508	1.91986
	309-YGGHSMSDPGTTYR-322	[5] Phospho (ST)	Pda1	Y	1684	804.813	45.4068	0.834017	2	0.00167229	43.7777	134487	11941.1	68040	52689.5	127585	55853.7	496505	177299	28.8	0.00351564	2.18687
	946-NNSLPEFAQLPSFR-959	[3] Phospho (ST)	Pdr1	Y	1904	850.398	84.8428	0.915017	2	5.40633e-05	48.5115	109958	17898.7	440791	355769	152678	74066.3	659910	101884	53.88	0.00543973	3.20215
	50-HLSNILSNEEGIER-63	[3] Phospho (ST)	Pdr12	Y	751	845.895	66.0275	2.08262	2	8.36082e-06	58.1239	450685	93710.5	2.04257e+06	1.73636e+06	74966.6	43573.5	1.78346e+06	284474	72.14	0.00337219	1.99565
	16-SNHDDDYANSVQSYAASEGQVDNEDLAATSQLSR-49	[10] Phospho (ST)|[13] Phospho (ST)|[17] Phospho (ST)	Pdr12	Y	4063	1299.83	64.5988	0.885883	3	0.000614022	51.4636	278484	37531.9	850720	723539	195065	100388	746029	231242	28.11	0.00456387	1.17128
	66-SDAQSIFSSGVEGVNPIFSDPEAPGYDPK-94	[5] Phospho (ST)[9] Phospho (ST)	PDR5	Y	2151	1545.69	86.39	1.92767	2	0.000246906	39.0839	736545	228727	1.53568e+06	1.29631e+06	1.02765e+06	123705	6.12317e+06	2.39317e+06	23.8	0.00501941	1.62474
	845-MLQESSEEESDTYGEIGLSK-864	[1] Oxidation (M)|[5] Phospho (ST)|[6] Phospho (ST)|[10] Phospho (ST)	Pdr5	Y	4408	1204.46	62.721	0.841383	2	3.61895e-05	44.4687	771346	153656	48305.7	19398	285734	18307	61898.3	27525.4	17.19	0.00449799	1.86878
	826-NANDPENVGERSDLSSDRK-844	[12] Phospho (ST)|[15] Phospho (ST)	Pdr5	Y	609	754.974	41.115	1.1009	3	0.00883365	44.6097	609872	159787	792971	790793	239367	52002.4	961395	324066	19.06	0.00548373	2.4244
	49-TLTAQSMQNSTQSAPNK-65	[1] Phospho (ST)|[11] Phospho (ST)|[13] Phospho (ST)	Pdr5	Y	5887	1023.89	40.7232	0.916867	2	1.8033e-07	25.1342	376302	94580.3	69515.7	8391.83	3978.3	972.566	26279.4	2251.69	20.51	0.00361635	1.76773
	43-FSAGSGSESHTESSRSDDEDSQAK-66	[16] Phospho (ST)|[21] Phospho (ST)	Pex25	Y	9066	887.661	34.8993	1.09092	3	0.00163225	49.6979	93692.7	22027.7	175633	103368	13282.7	1422.55	132259	35057.5	18.26	0.00597375	2.24581
	141-RLDDGDSDDENLDVNHIISR-160	[7] Phospho (ST)	Paf1	Y	1203	793.347	64.6677	1.74242	3	2.75777e-06	25.5728	395674	101185	978360	821463	108256	20979.4	1.54805e+06	214526	65.28	0.000719402	0.302649
	172-DAFLEATSEDEIISR-186	[8] Phospho (ST)	Pfk1	Y	1040	888.394	72.8187	1.93295	2	0.000241387	32.7118	689415	92591.6	956766	736490	879920	287838	2.41345e+06	300477	38.46	0.00640623	3.60962
	665-KRSNPTSASSSQSELSEQPK-684	[6] Phospho (ST)	Pfk26	Y	13143	743.346	40.105	0.501667	3	0.00402666	160.079	54.8537	87.8092	53675.5	56292.8	768.601	606.649	31429.2	34587.3	38.64	0.00531655	2.3873
	110-RRNQGLDPDSDADIEELLEE-129	[10] Phospho (ST)	Pga2	Y	838	1197.53	86.9846	1.30572	2	3.41729e-06	29.503	1.92022e+06	566524	295162	219051	9.72744e+06	1.19404e+06	649838	153190	64.99	0.00173828	0.72639
	293-RPSNTFNLDADRINNDENSSGNEEDEDGNRQEVLDFQDAER-333	[3] Phospho (ST)|[19] Phospho (ST)|[20] Phospho (ST)	Pho91	Y	859	1242	72.2788	1.69005	4	3.7171e-06	12.135	6.21699e+06	696171	1.01914e+06	848726	1.87846e+06	168108	2.27672e+06	276279	20.38	0.0158707	3.1972
	222-ALLELLDDSPVTPGETRPAYDGYEASK-248	[12] Phospho (ST)	Pil1	Y	1727	996.471	84.1843	1.73285	3	2.7726e-05	38.2956	189238	42657.7	527355	465383	378556	6934.14	2.93932e+06	425692	69.11	0.00581103	1.94584
	60-DLSDLEELEDDEDEDFLEAYK-80	[3] Phospho (ST)	Plp2	Y	293	1306.52	92.0804	1.6505	2	0.00249057	23.5928	5.33618e+06	519446	3.63023e+06	1.84914e+06	3.00123e+06	708075	3.29828e+06	243972	102.16	0.00577089	2.2102
	591-LGLGGGGDMPGSELADFVENADGFAEVFPQHK-615	[9] Oxidation (M)	Pma1	Y	68	1093.18	97.7201	3.16863	3	2.40359e-06	9.94088	9.02635e+06	897299	1.10617e+07	9.65263e+06	1.88061e+07	1.6673e+06	3.58375e+07	2.68475e+06	117.02	0.00621165	1.89582
	899-SVEDFMAAMQRVSTQHEKET-918	[13] Phospho (ST)|[14] Phospho (ST)	Pma1	Y	6681	828.673	73.1058	0.922833	3	0.00269557	98.2797	63517.9	10569.9	284464	246445	21258.8	20893.1	43267.8	31478.5	16.53	0.00610394	2.4583
	1353-RSSSFTETVPTEPTR-1367	[3] Phospho (ST)|[4] Phospho (ST)	Pmd1	Y	6734	927.889	52.8014	0.403617	2	0.0103602	108.606	104808	33313.8	73063	65049.7	7652.7	8311.26	68558.1	31519.1	26.81	0.00354716	1.91349
	27-ESSSISVSEELSSADERDAEDFSK-50	[8] Phospho (ST)|[12] Phospho (ST)	Pmt2	Y	973	922.032	68.2134	3.60378	3	9.50476e-06	24.3567	6.51925e+06	412842	1.0957e+06	929375	5.95926e+06	387112	1.8114e+06	72727.8	17.22	0.00517705	1.87366
	247-RQNVLQDTLLANPPSAQSLADEEDDEDSDEDIILK-281	[28] Phospho (ST)	Pol1	Y	3278	1326.28	86.9104	0.714417	3	0.00985327	84.9641	943196	167686	135294	164342	1.49686e+06	281686	135148	44230.5	27.85	0.00616826	1.55145
	5-RRFSSEHPDPVETSIPEQAAEIAEELSK-32	[4] Phospho (ST)	Prp43	Y	1395	808.886	92.6198	3.0034	4	3.32391e-05	69.8132	2.89906e+06	503616	873934	191391	46766.7	32649.4	840120	266402	23.59	0.00716996	2.21877
	50-LEDIPVDDIDFSDLEEQYK-68	[12] Phospho (ST)	Prt1	Y	290	1182.02	88.6842	2.1157	2	0.0043933	23.5914	4.28916e+06	924379	2.52584e+06	2.3082e+06	1.01984e+07	1.06689e+06	5.12124e+06	1.0435e+06	111.25	0.00549697	2.32724
	583-ANDIEILEPMESLRSTTK-600	[12] Phospho (ST)|[17] Phospho (ST)[15] Phospho (ST)[19] Phospho (Y)	Ptr2	Y	2958	736.33	77.6212	0.698617	3	0.000404993	33.7471	146950	27844	65116.4	21332.5	227632	16628.2	334065	38108.7	32.23	0.00483867	2.19345
	35-DSYVSDDVANSTERYNLSPSPEDEDFEGPTEEEMQTLR-72	[11] Phospho (ST)	Ptr2	Y	2455	1477.95	76.2489	1.00033	3	5.77483e-07	21.3966	1.54312e+06	137101	176009	67978.6	3.09598e+06	662435	342746	59935.6	67.41	0.0143587	3.24064
	635-MTEAGSLDLIDDAGENSDLEDRIDNSLPGSQR-666	[17] Phospho (ST)	Pwp2	Y	2080	1171.85	82.8482	2.94712	3	0.000360089	16.2386	3.18099e+06	516548	1.07396e+06	930364	3.023e+06	319049	1.59412e+06	196067	65.72	0.0072274	2.05761
	223-RPSDDDDNESEDDDKQEEVDISK-245	[10] Phospho (ST)	Pwp2	Y	693	920.695	43.6697	1.58032	3	0.000526419	36.8293	1.99881e+06	466387	1.88859e+06	730305	258843	41987.5	1.58363e+06	504960	60.64	0.00546648	1.98129
	1854-RRFSITEEAIADNLDAAEDAIPEQPLEQK-1882	[4] Phospho (ST)	Ura2	Y	2652	838.156	88.2919	1.03468	4	0.00705291	75.542	50594.2	25131.8	5.40518e+06	8.64013e+06	17049.7	11389.2	441139	333245	22.8	0.0242965	7.25575
	33-LALTRTESVKPEPEITAPPHSR-54	[4] Phospho (ST)|[6] Phospho (ST)|[8] Phospho (ST)	Qdr2	Y	660	668.06	58.0135	1.75592	4	0.00105516	53.8044	974938	210286	1.65703e+06	1.19554e+06	119264	26308.1	393472	167947	22.96	0.00364775	1.36712
	11-ENDFEDELAESMQSYNRETADK-32	[11] Phospho (ST)|[15] Phospho (Y)	Qdr2	Y	652	927.683	67.7385	1.2111	3	0.000430059	28.1546	1.3738e+06	386788	972990	807432	390826	35863.4	1.46436e+06	77707.4	28.44	0.00612326	2.2026
	50-TNLESTASNSR-60	[8] Phospho (ST)	Qdr3	Y	2952	630.268	36.244	1.06923	2	6.00932e-05	59.8655	84188.4	25905.6	95955.6	45055.2	1926.62	1153.38	193108	77761.9	40.85	0.00303493	2.41151
	931-SMTNVLSPKKHTDDEKDINTHTEVYNNEIESSSEK-965	[2] Oxidation (M)|[7] Phospho (ST)|[12] Phospho (ST)|[20] Phospho (ST)|[22] Phospho (ST)	Rad9	Y	2852	1452.58	98.127	0.839017	3	3.50156e-05	20.8372	1.43389e+06	154835	538539	411408	2.11232e+06	122792	499917	104169	16.98	-0.0170336	3.91151
	237-DYEPLMSTETPLPLHNDNSGT*VLGTA-262	[21] Phospho (ST)	Rbd2	N	1645	1426.64	82.4055	1.06147	2	1.16936e-05	27.4438	246363	38984.9	1.70161e+06	1.41398e+06	293452	146.566	1.56846e+06	430444	27.05	0.00674279	2.36484
	102-SRSTDDAVSLQDNNLALLEDHR-123	[3] Phospho (ST)	Rcn2	Y	1566	850.394	70.3302	1.60047	3	1.98396e-07	8.57252	549175	45758.5	709982	532533	236464	15747.4	1.1644e+06	15219.7	37.94	0.00457181	1.79417
	235-DSEGNAQSEEEHDLERGYGSDDENSK-260	[20] Phospho (ST)	Reg1	Y	6414	993.049	49.3679	0.9991	3	4.39061e-05	62.1062	115960	34178.8	38807.2	59105.3	304761	31143.6	13654.4	4969.25	15.5	0.00754192	2.53415
	1632-VDDLRSDEDEHGTVAQEK-1649	[6] Phospho (ST)	Rif1	Y	5222	708.304	41.8013	0.834967	3	0.000116128	37.0723	95938.9	26883.2	61920	39551.2	6913.21	1487.36	104463	32786	35.97	0.00433605	2.04349
	1449-SEHFSEQPGVHRRTSSASLMGSSSDGSVSTPGSNASNTTSGGKLK-1493	[27] Phospho (ST)|[29] Phospho (ST)|[30] Phospho (ST)|[33] Phospho (ST)	Rim15	Y	671	1609.66	101.994	1.08245	3	0.00016063	52.0692	1.22765e+06	57040.8	3.32464e+06	2.97613e+06	1.55034e+06	807247	8.67367e+06	2.16125e+06	19.37	-0.00639974	1.3261
	EEEAKEESDDDMGFGLFD	[8] Phospho (ST); [9] Phospho (ST)	Rpp1A/Rpp1B		206	1079.89	77.4106	2.12275	2	2.98212e-08	9.67868	1.09038e+07	1.04455e+06	2.56033e+06	2.14879e+06	675491	45775.4	3.21609e+06	311275	55.84	0.00549388	2.5461
	201-ALPDAVTIIEPKEEEPILAPSVK-223	[21] Phospho (ST)	Rps3	Y	1845	847.117	80.4685	1.36587	3	8.04713e-05	56.0812	611982	343207	740411	186653	13585.5	2350.04	502285	33028.3	30.89	0.00538706	2.12229
	1-MSDTEAPVEVQEDFEVVEEFTPVVLATPIPEEVQQAQTEIK-41	[1] Oxidation (M)|[4] Phospho (ST)	Rps5	Y	301	1566.41	104.294	1.06133	3	0.000828429	23.9661	5.70668e+06	987648	2.39737e+06	2.11894e+06	1.08168e+07	2.59236e+06	5.54478e+06	285201	18.61	0.011255	2.39662
	229-RRASSLKA-236	[4] Phospho (ST)|[5] Phospho (ST)	Rps6A	Y	70	524.74	34.5665	7.77167	2	5.4287e-06	52.6808	1.38213e+07	2.87785e+06	242512	183584	7.58259e+06	1.39349e+06	167977	66859.7	20.28	0.00209767	2.00262
	181-DHRYPGLTPGLAPVGLSDEEDSSEED-196	[17] Phospho (ST)|[22] Phospho (ST)|[23] Phospho (ST)	Rrt14	Y	2060	1009.05	77.064	0.92895	3	0.0021773	63.3279	880940	131110	157959	116576	1.23943e+06	1555.76	291320	184487	26.14	0.00721526	2.38589
	233-RKLSEDGVTDGDGKPIPESER-253	[4] Phospho (ST)	Rsc3	Y	5762	592.032	46.3279	0.671683	4	0.00634559	150.527	726.679	419.368	12138.8	12211.4	13.1631	18.6155	221288	333098	27.54	0.00164015	0.693775
	199-DDEGSEYGDDEEYNPFDRR-217	[5] Phospho (ST)	Rtf1	Y	2616	796.625	67.1595	1.18763	3	7.54516e-06	27.909	690088	98049.3	62077.4	33649.1	424212	118393	263426	30246.1	30.31	0.00242949	1.01786
	179-HYSDNEDEDDEEDYREEDYK-198	[3] Phospho (ST)	Rtf1	Y	5008	892.314	45.6552	1.15305	3	0.000255539	53.5198	145077	77644.9	373129	107947	14946.6	2840.01	267280	61436.2	32.99	0.00581366	2.17422
	248-AYTSSAQVMPEVPQHEPSTTQEFNVDELSNELK-280	[18] Phospho (ST)	Rtn1	Y	3022	1235.92	78.3692	1.32943	3	0.000748166	70.296	167117	14814.1	306479	298931	715463	15670.2	1.88717e+06	285916	41.53	0.0101389	2.73677
	115-SLEDLGAGDQGIMFGYATDETPEGLPLTILLAHK-148	[1] Phospho (ST)	Sam2	N	3433	1218.26	102.161	0.840333	3	0.000284355	63.073	150760	1828.82	792041	690794	298172	188066	547059	102479	44.31	0.0100571	2.75406
	761-YNTVLGDFGNDQESDDDVIR-780	[14] Phospho (ST)	Sap190	Y	1581	1176.49	77.4106	1.00135	2	8.70055e-05	15.6142	903098	76397	835072	713804	820478	128111	540851	11779	84	0.00797735	3.39323
	329-KLNELQNSEDSDAEDGGK-346	[8] Phospho (ST)|[11] Phospho (ST)	Sas10	Y	7893	1054.91	44.4222	0.55305	2	0.000816627	60.9228	80149.7	23108.3	235050	122086	4488.45	832.167	92737.9	56498.5	16.77	0.00478799	2.27156
	566-DRTNTFCGTTEYLAPELLLDETGYTK-591	[7] Carbamidomethyl (C)|[10] Phospho (ST)	Sch9	Y	742	1030.14	91.2474	1.5707	3	4.09231e-05	15.9655	2.15331e+06	22220.3	779276	620215	1.17493e+06	3433.65	2.15031e+06	343309	22.07	0.0105471	3.41621
	1100-LTYEPIDLSSILSDGEEK-1117	[13] Phospho (ST)	Scp160	Y	601	1044.99	89.8747	1.1683	2	8.46205e-05	42.5946	2.34853e+06	347363	368423	383553	4.39492e+06	134524	308716	70478.7	73.32	0.0023691	1.13465
	100-AVADVWSDLEAEFK-113	[7] Phospho (ST)	Scs2	Y	2340	830.371	97.9567	0.742567	2	0.00848609	57.4476	186064	53871.6	199353	112937	100275	57605.6	430932	97830	34.93	0.00496393	2.99262
	600-GKESDSDLELSDDDDEK-616	[4] Phospho (ST)|[6] Phospho (ST)|[11] Phospho (ST)	Sda1	Y	1739	1068.85	47.0469	1.34688	2	0.000128432	78.6686	654423	142572	696555	247958	23066.2	18145.8	629565	174208	28.23	0.00415817	1.94701
	269-EREENFEENSEDEDGFDLDALR-290	[10] Phospho (ST)	Sda1	Y	2840	913.365	76.1551	1.08775	3	0.000424141	43.0926	137630	59308.3	414402	355168	77066.2	3519.2	580394	129255	42.58	0.00616312	2.25172
	437-SSSSTSLNSHSPLMTAMEDPPSPR-460	[22] Phospho (ST); [1] Phospho (ST)	Sds24	Y	2466	866.042	68.5977	0.719117	3	0.00381416	57.7326	469296	50298.1	187294	128658	110346	63705.6	263497	48253.8	45.84	0.00496455	1.91305
	837-GHTSSISSYTPNQNEHASR-855	[5] Phospho (ST)	SEC16	Y	3964	718.308	44.2244	0.929167	3	6.4582e-05	49.0815	71952.3	19315.1	141755	119746	7250.9	2690.88	380991	186996	21.96	0.00518716	2.41051
	507-IGPLVEDDSDEDQNDAISVR-526	[9] Phospho (ST)	Sec2	Y	1303	1133.99	66.6796	0.9324	2	0.00979368	33.0307	676237	158239	641339	547081	229484	69122	536439	177189	91.11	0.00485738	2.14363
	987-NSRVPSLVATSESPR-1001	[6] Phospho (ST)	Sec31	Y	5193	840.411	55.3771	1.23192	2	0.000699494	93.4601	5389.44	4797.4	2209.79	2886.4	568735	189470	12245.4	2414.31	21.06	0.0037052	2.20705
	442-NHQQQSAIELSEASENAETPAPLTLENMDK-471	[6] Phospho (ST)|[28] Oxidation (M)	Sec7	Y	3798	1131.17	67.9202	1.02325	3	2.56599e-05	42.5207	244858	68387.8	684419	545006	61731.8	26248.8	972622	198566	27.95	-0.00162729	0.479957
	787-SSIMTSNDDFKPTYEDEESRSLSSQNIDADDPTQFENLK-825	[14] Phospho (Y)|[23] Phospho (ST)	Sec7	Y	2762	1538.64	72.3709	0.6599	3	0.00034309	51.3568	1.97756e+06	293040	398512	323806	1.14749e+06	589314	323007	78094	19.32	0.00294694	0.638847
	185-NSLNHSNSTLNVGPSR-200	[6] Phospho (ST)	Sec9	Y	7530	888.907	48.213	0.419883	2	0.0107012	54.11	57659.4	26589.9	34924.3	32220.5	11838.3	6405.69	83400.6	33477.2	15.35	0.00436725	2.45932
	208-SFNQDYNTVDELPWYK-223	[1] Phospho (ST)	Sfk1	Y	132	1049.95	82.6414	2.06527	2	4.77891e-07	4.98738	6.30851e+06	314630	4.41629e+06	3.77059e+06	3.20679e+06	139352	6.22659e+06	31067.2	70.74	0.00507238	2.41787
	42-DSIINSPVSGRQSISPTLSNATTTTTK-68	[13] Phospho (ST)|[15] Phospho (ST)	Sis2	Y	7734	979.461	64.6677	0.386217	3	0.0011249	111.115	193841	61246.1	26450.7	17454.5	115333	128153	5248.72	1445.87	32.37	0.00248533	0.846688
	124-DYSPGINHLYSSDSQQDFMEK-144	[14] Phospho (ST)	Skg6	Y	2162	847.683	68.1653	0.838133	3	3.73422e-05	44.5966	179314	14918.2	314130	116761	45436.6	20263.2	505609	17593.6	28.26	0.00587246	2.31197
	290-TPARTPTPTPPVVAEPAISPRPVSQR-315	[7] Phospho (ST)|[9] Phospho (ST)|[19] Phospho (ST)	Sla2	Y	1025	721.364	60.5211	1.31218	4	0.00128435	57.1745	1.1023e+06	259751	188520	205929	854237	61088.1	204757	40375.1	18.39	0.00346452	1.20236
	316-LYASSFSSNHGPSSGSFEEEHTK-338	[14] Phospho (ST)	Slg1	Y	4636	855.691	55.1808	0.8771	3	0.0100628	49.9086	183371	77638.8	152504	138185	46473.3	15684.9	243956	121755	17.18	0.00137076	0.534607
	208-RSATRAR-214	[2] Phospho (ST)	Slx5	N	407	897.444	46.4146	2.80677	1	0.00739581	47.1562	1.92158e+06	505660	2.71189e+06	2.55637e+06	695416	140527	3.50269e+06	1.65174e+06	16.68	0.00289477	3.22921
	92-SGAFNMDSDSDDGFDAHAIFESFVR-116	[6] Oxidation (M)|[8] Phospho (ST)|[10] Phospho (ST)	Snq2	Y	573	966.367	98.8243	3.74873	3	5.47367e-05	12.2033	6.38247e+06	778873	2.60938e+06	2.24818e+06	3.54795e+06	50771.9	2.51933e+06	162992	28.3	0.0070051	2.41883
	805-LPANIVELDLHESPESVK-822	[13] Phospho (ST)|[16] Phospho (ST)	Spa2	Y	2499	717.334	77.2058	1.092	3	3.72447e-05	22.3733	181406	21380.2	93430.9	85196	972121	94169.8	210275	47045.4	15.71	0.00527464	2.45449
	382-KNDNHNDLKITDGFISKYSSADGLIPAQYILNANNLIIQFTTR-424	[18] Phospho (Y)|[20] Phospho (ST)|[29] Phospho (Y)	Spa2	N	16521	1269.85	111.547	1.09025	4	0.000267844	26.0084	254110	14462	74650.7	13428.5	189533	6823.07	102332	13592.9	18.83	-0.0105749	2.08356
	247-NYWDVNDSPIIK-258	[8] Phospho (ST)	Spa2	Y	705	772.346	75.1431	1.27475	2	0.00129808	23.7704	582174	51497	1.11642e+06	431578	366341	87080.8	891143	135749	32.03	0.00268016	1.73735
	32-DENTSDKDTVDSGNVTTTESTER-54	[5] Phospho (ST)	Spt5	Y	7200	861.021	42.6512	0.77485	3	0.0003343	68.6505	124970	32164.8	121149	67492.8	5070.93	3481.22	63096.2	16570.6	24.09	0.00514929	1.99582
	88-EEDDRLSEDDLDLLMENAGVER-109	[7] Phospho (ST)	Spt6	Y	4499	881.712	84.6044	0.654717	3	0.00923057	133.585	32461.2	18982.3	205116	221175	32479.8	11447.1	804673	78077.4	16.58	0.00915713	3.46585
	190-GGILDELDDFIEDDEFSDEDDETRQR-215	[17] Phospho (ST)	Spt6	Y	492	1051.76	99.3113	2.66382	3	7.39993e-08	17.4247	4.12515e+06	654140	251836	181100	9.745e+06	936542	503373	39737.5	90.71	0.00687103	2.17971
	150-LEDFFSEDEEEEESGLR-166	[6] Phospho (ST)	Spt6	Y	3224	1070.42	76.0861	1.07015	2	0.000106984	20.8168	800460	18891.7	356323	300185	424981	31818.2	220414	45883.2	31.74	0.00815554	3.8131
	110-ILDDVSNDDDDDDDDDDDNDK-130	[6] Phospho (ST)	Src1	N	4734	1239.41	46.7524	0.848833	2	0.000243109	40.8212	307685	93345.1	234269	34314.5	16107.1	4533.41	192791	78699.5	65.77	0.00477583	1.92822
	198-HLNLLSSDSEIEQDYQK-214	[6] Phospho (ST)|[7] Phospho (ST)|[9] Phospho (ST)	Src1	Y	2565	1129.94	70.8462	0.970067	2	1.19283e-06	19.8505	1.17301e+06	148604	533195	480358	1.09875e+06	183628	131835	26169.9	26.37	0.00416433	1.84437
	574-IEAALSDALAALQIEDPSADELRK-597	[18] Phospho (ST)	Ssb1/Ssb2	Y	1454	873.771	91.4454	1.05525	3	2.41849e-05	50.9922	74820.5	38152.6	815073	695632	56379.8	27368.5	1.07171e+06	53922.9	92.57	0.00732366	2.79712
	434-TTVSPYNSIESVEESNSALDFTR-456	[15] Phospho (ST)|[17] Phospho (ST)	Ssu1	Y	324	1353.57	76.9951	2.67783	2	2.52673e-06	15.8573	4.46414e+06	322814	6.91127e+06	5.84364e+06	1.73752e+06	200086	1.12801e+07	1.41447e+06	55.3	0.00361696	1.33708
	468-EENAEEDDESEWSDDEPEVVREK-490	[13] Phospho (ST); [10] Phospho (ST)	Ssz1	Y	3695	949.035	62.4772	1.42217	3	6.91061e-07	29.6394	169959	7983.54	60107.4	38121.2	1.87547e+06	555878	101912	7084.55	24.19	0.00514858	1.81028
	305-TNTITSDFTTSTDRFYPGTLSSFQTDSINNDAK-337	[27] Phospho (ST)	STE2	Y	2203	1242.56	82.5476	1.46288	3	1.58448e-06	28.4194	1.43291e+06	407225	195667	100965	6.22157e+06	355172	244963	60698	70.52	0.002413	0.647846
	375-NQFYQLPTPTSSK-387	[8] Phospho (ST)|[12] Phospho (ST)[11] Phospho (ST)	Ste2	Y	2546	835.849	65.8087	0.759033	2	0.000838877	53.8486	135621	51625.3	314521	269942	53046.9	28565	640683	160678	17.08	0.00356314	2.13403
	1012-SEGDEESDDAVDENDVKK-1029	[7] Phospho (ST)	Stu1	Y	8473	1030.9	39.1574	0.9394	2	0.0059239	91.5719	119977	8944.4	2.34957e+06	3.81278e+06	18590.8	17024	44777.7	21647.8	27.94	0.00362583	1.7603
	811-RSSESIGDLPHR-822	[5] Phospho (ST)	Stu2	Y	5622	478.557	47.8325	0.925283	3	5.87889e-05	82.2192	66329.5	10527.7	41509.2	34128.5	0	0	35748.9	29270.9	43.48	0.00211932	1.47931
	621-SASISGISDHQQEGYQPLEQEK-642	[3] Phospho (ST)	Sum1	Y	986	837.707	58.5355	1.14903	3	0.00643988	32.9175	576669	189825	515122	373780	344714	79003.1	1.14653e+06	178016	24.19	0.0042073	1.67615
	293-SHERPDDVSV-302	[1] Phospho (ST)|[9] Phospho (ST)	Sur7	Y	198	650.735	45.0435	1.41317	2	0.00880698	44.1597	1.81233e+06	537030	559558	547683	1.4262e+06	325218	500628	154932	38.2	0.00270249	2.07971
	221-NQSVEDLSFLEQGYQHR-237	[3] Phospho (ST)	Stv1	Y	462	1065.47	73.8766	2.60198	2	0.000430116	9.488	3.92529e+06	246290	3.45802e+06	2.99241e+06	5.33751e+06	351928	6.88244e+06	585302	71.27	0.00314876	1.47904
	701-FIEATKESDEDSDADEFFDAEEAASDKK-728	[5] Phospho (ST)|[12] Phospho (ST)	Swh1	Y	4347	1100.43	70.3963	0.80915	3	0.000373428	29.4002	533517	30857.2	655175	251723	217814	64037.6	143491	41218.6	23.37	0.00905548	2.74553
	57-SVSADAEAEKEPTDDIAEALGELSLK-82	[3] Phospho (ST)	Syr1	Y	2874	923.433	91.6412	0.9053	3	1.51392e-07	18.0123	114649	20650.9	381084	329318	58875.3	3341.37	567636	34790.2	29.06	0.00835952	3.02086
	571-NIFVSPSLTEIDK-583	[9] Phospho (ST)	Tat1	N	448	771.878	77.3428	1.04985	2	8.99447e-05	24.6447	495648	33647	4.64442e+06	6.62556e+06	636402	15596.1	1.90387e+06	232761	54.73	0.00400794	2.59962
	1353-ASLDYDPSVPNTSYAPVQSASPVVKPTDNTSSSSNKK-1389	[30] Phospho (ST)|[31] Phospho (ST)[21] Phospho (ST)|[27] Phospho (ST)|[30] Phospho (ST)[33] Phospho (ST)|[34] Phospho (ST)	Tcb3	Y	7666	1360.26	65.2854	0.77855	3	0.0035755	47.763	489162	115907	167233	117153	283309	135317	91471.9	32432.9	39.8	0.0146207	3.58547
	519-RLSAYLESSK-528	[3] Phospho (ST)	Tgl1	Y	1461	617.298	57.5615	1.0632	2	0.000519765	30.3978	119179	36227.9	167550	97456	86722.7	2832.46	487586	105454	45.55	0.00216819	1.75907
	490-VFSTSAIDEDNENEHQDDTEDQIHK-514	[3] Phospho (ST)	Tgl1	Y	15347	999.409	57.8436	0.1727	3	0.000154813	55.2402	11944.2	6264.9	13900.6	10587.8	467538	136409	11094.4	6128.59	17.59	0.00697395	2.32838
	542-AYTLGEGYTTGHEYRPEGSDDEIPELVK-569	[19] Phospho (ST)	Thi7	Y	2090	1069.48	72.4838	1.3806	3	2.49868e-05	37.0585	268632	99551	1.64912e+06	1.47477e+06	187891	49830.7	2.14266e+06	127988	33.76	0.00599597	1.87058
	179-SQNAPSDGTGSSTPQHHDEDEDELSR-204	[12] Phospho (ST)	Tif5	Y	1012	959.382	40.3979	1.41872	3	4.76806e-05	48.5314	238762	36007.7	803090	607306	89344.5	43360.2	1.76384e+06	570651	54.74	0.00613977	2.13549
	62-EIMATTTDDDGIPSPSHPMEK-82	[7] Phospho (ST)	Tna1	Y	3124	784.665	61.1198	0.8303	3	0.00168475	41.6813	136138	31202.5	304785	307292	79959.7	49.2804	441623	151385	17.9	0.00290762	1.23677
	639-EKPIDSVVDEYLSESVQK-656	[6] Phospho (ST)|[15] Phospho (ST)	Tok1	Y	428	1112.99	76.2934	1.39903	2	8.76991e-05	7.23469	2.31093e+06	158950	4.22988e+06	717562	2.52929e+06	123372	2.30854e+06	167016	43.56	0.00468434	2.10631
	53-RQSEAFAGQNEDEADLK-69	[3] Phospho (ST)	Tom71	Y	2969	994.423	50.9502	1.06002	2	0.0106151	95.7454	226535	80149.3	276927	230865	77907.8	74593.1	792568	323294	72.13	0.000438357	0.220631
	32-VASMNSASLQDEAEPYDSDEAISK-55	[18] Phospho (ST)	Top1	Y	5244	1319.05	61.1405	0.5687	2	0.00555879	52.2093	433305	226225	331396	283336	73133.7	24713.5	249240	79305.6	37.97	0.00558972	2.12046
	1312-ENTPEQDDVATK-1323	[3] Phospho (ST)	Top2	Y	8968	713.792	35.0131	0.5852	2	0.00811614	129.804	101446	21330	17025.5	23990.2	28217	36626.9	2527.73	1737.6	37.3	0.00308938	2.16712
	87-ILTGSVNEPDRVEVDYTNCAPMGGDRPYPPSLPSR-121	[3] Phospho (ST)|[5] Phospho (ST)|[19] Carbamidomethyl (C)	Tpo1	Y	1638	1009.7	69.3852	1.81873	4	0.0147396	38.3287	2.44369e+06	305660	752776	653903	1.77712e+06	99478.9	1.21429e+06	465424	15.54	0.012141	3.0091
	136-EDQSGENELDPEIEFVTFVTGDPENPHNWPSWVR-169	[4] Phospho (ST)	Tpo2	N	4129	1323.95	103.61	0.390283	3	0.234185	97.2197	207736	53239.8	319823	281785	111969	27710.4	380664	98757	54.97	0.0448566	11.3024
	50-SLQDLGVTSAAPVPDINAPQTAK-72	[1] Phospho (ST)	Tpo2	Y	528	1187.09	71.7051	1.34462	2	3.14106e-05	42.3153	704393	298066	3.14688e+06	2.635e+06	109105	33381.4	358845	115271	99.9	0.00562953	2.37316
	114-TRQIDGASSPSSNEDALESDNNEK-137	[19] Phospho (ST)	Tpo3	Y	5930	882.041	45.5428	1.01297	3	7.06355e-05	72.7444	9507.91	6916.47	9265.63	5961.38	707133	138504	9920.08	3290.56	28.95	0.00783337	2.96371
	80-IFPEEYTLETPTGLVPVATLHSIGRTSTAISR-111	[19] Phospho (ST)|[22] Phospho (ST)|[26] Phospho (ST)[27] Phospho (ST)|[28] Phospho (ST)	Tpo3	Y	2495	944.933	89.541	1.31208	4	1.82358e-06	25.9908	739142	137152	1.01744e+06	952365	134860	10151.2	69532.8	16792.9	20.2	0.0088081	2.33284
	55-SLQDMGVSSK-64	[1] Phospho (ST)	Tpo3	Y	3504	1131.48	49.1324	0.608667	1	0.0022562	138.837	159090	96401.9	419316	124934	870.059	1207.96	145079	118291	36.89	0.00280055	2.47734
	140-EGDSSGANDEAPDLDPEIEFVTFVTGDPENPHNWPAWIR-178	[4] Phospho (ST)	Tpo3	N	750	1468.65	104.343	0.73915	3	6.68855e-05	24.7803	1.12541e+06	261211	1.54474e+06	1.33917e+06	270657	75.6477	1.77781e+06	295217	133.58	0.0191568	4.35095
	606-THTQPVPASFDREDGQHAQNR-626	[3] Phospho (ST)	TPO4	Y	5000	618.528	45.7651	2.24255	4	7.21354e-05	74.0064	134227	43450.2	203150	150344	1560.93	130.638	510344	217700	23.04	0.00412011	1.66801
	627-NEPISNSLYSAIK-639	[9] Phospho (Y)|[10] Phospho (ST)	Tpo4	Y	370	798.345	69.2733	1.43607	2	3.81103e-05	23.372	1.15724e+06	131920	1.12222e+06	972557	600731	140403	2.02186e+06	73214.4	40.13	0.00670416	4.20411
	640-DNEDGYSYTEMATDASAR-657	[9] Phospho (ST)|[11] Oxidation (M)	Tpo4	Y	3230	1046.38	51.0592	0.8395	2	0.00120928	55.7146	327698	160882	248070	215948	36387.9	20273.4	312612	40704.3	32.85	0.0040756	1.94936
	559-EAETEGGIDDVNAVDGELNLTR-580	[21] Phospho (ST)	Tpo4	N	3566	1199.03	71.0504	0.878383	2	0.000330289	34.3635	153230	52655.3	627100	494603	131850	36086.7	629758	85576.8	39.18	0.00770249	3.21468
	1-SSSVTSASSHYIGLPQEAQINGEPLQR-27	[3] Phospho (ST)|[11] Phospho (Y)	Tps3	N	2087	1006.12	71.5224	0.9301	3	0.000120907	23.1802	765653	67574.2	293069	167510	827518	57731.9	237056	54950	32.78	0.00425477	1.41104
	151-NPTDDDFPHEAVVR-164	[3] Phospho (ST)	Tvp18	Y	2594	846.358	56.9247	0.801183	2	1.13821e-05	34.5706	226100	78164.2	161647	127570	26375.4	824.348	435579	81100.1	32.32	0.0033379	1.97427
	614-IIEHSDVENENVK-626	[5] Phospho (ST)	Ubp1	Y	1458	803.363	42.4235	0.844233	2	5.97709e-05	59.3361	131841	32056.8	439699	235682	13761	8165.22	440598	147277	21.98	0.00346339	2.15827
	627-DNEELQEIDNVSLDEPK-643	[12] Phospho (ST)	Ubp1	Y	724	1033.95	68.3064	1.61313	2	0.00562893	16.6966	1.85069e+06	92322	1.69237e+06	1.35957e+06	1.81563e+06	40176	3.05901e+06	510751	58.4	0.00496182	2.4018
	525-AAQQDSSEDENIGGEYYTK-543	[6] Phospho (ST)|[7] Phospho (ST)	Ubp1	Y	7401	1132.92	53.1529	0.665767	2	0.00329816	50.6373	233239	118106	147040	102889	24000.5	10970.8	88419.8	17296.6	17.66	0.00333833	1.47465
	1854-RRFSITEEAIADNLDAAEDAIPEQPLEQK-1882	[4] Phospho (ST)	Ura2		2268	1117.21	87.2789	0.5435	3	0.00705291	75.542	50594.2	25131.8	5.40518e+06	8.64013e+06	17049.7	11389.2	441139	333245	22.8	0.00840742	2.51074
	8-KASETSDQNIVK-19	[3] Phospho (ST)	UTP22	Y	6004	700.328	39.2887	0.682883	2	0.00409511	80.8892	25020.3	4619.63	109869	93118.8	4928.06	3355.9	170985	138308	16.47	0.00271297	1.93972
	317-IAQESKEQSLPATPLYNFSVLSSSTHENYLKYLYK-351	[5] Phospho (ST)|[9] Phospho (ST)|[16] Phospho (Y)|[24] Phospho (ST)|[25] Phospho (ST)	Utp22	N	11191	1483.63	108.577	0.668583	3	0.00321171	41.0982	393981	37107.9	163400	72995.8	83791.1	26444.3	84742.9	29295.2	23.36	-0.0220284	4.95256
	152-DIDSEDEQDPFESHFNQVPEK-172	[4] Phospho (ST)	Utp25	Y	631	862.352	68.7791	1.0799	3	0.0100855	19.3867	1.81519e+06	182947	914183	710975	2.12419e+06	55581.5	1.19908e+06	232463	31.84	0.00486433	1.88246
	10-DSSDEASVSPIADNEREAVTLLLGYLEDK-38	[7] Phospho (ST)[3] Phospho (ST)	Vac8	Y	43	1072.84	104.416	0.987133	3	1.335e-08	14.0235	1.04492e+07	627556	676163	555067	2.16696e+07	1.23115e+06	4.07134e+06	300771	51.3	0.00783775	2.43751
	55-IEEINENSPLLSAPSK-70	[8] Phospho (ST)	Vba4	Y	1664	910.939	62.7451	0.99945	2	1.69383e-05	21.6621	158223	21809.1	178547	107520	182617	20759.5	821191	177888	49.03	0.00368391	2.02428
	175-ADDMPVVQADNQTSSSK-191	[15] Phospho (ST)	Vba4	Y	1024	936.889	50.6893	1.19668	2	0.000636167	31.4399	726852	228522	817827	722885	219044	38007.7	1.067e+06	250281	60.68	0.00346735	1.85246
	192-SLHIVAPSPEVPVSGDEITSYGYGSIPQSIGDVENGLNPPYVENTSSDELVHDLTR-247	[1] Phospho (ST)	Vba4	Y	360	1508.47	92.2989	2.75575	4	0.000195716	22.4425	1.37583e+07	1.84061e+06	5.42442e+06	3.35268e+06	4.96274e+06	505202	4.33417e+06	972698	39.49	0.00111559	0.185012
	1-MDATTPLLTVANSHPAR-17	[1] Oxidation (M)|[13] Phospho (ST)	VCX1	Y	2579	945.944	60.6303	0.81915	2	0.00125303	66.6748	66666.8	44450	237460	131665	26880.2	3023.34	581286	116580	58.87	0.00330612	1.74939
	18-LPEDDQYLYSDDTNSSIIAEEELHHSVDK-46	[9] Phospho (Y)|[13] Phospho (ST)	Vht1	Y	3441	1174.82	68.5283	1.07942	3	9.55241e-08	17.7461	1.17601e+06	92157.1	293190	316211	995998	28396.4	515181	23483.6	30.49	0.00639204	1.81518
	108-SHSVPDLNTATPSSPK-123	[3] Phospho (ST)[14] Phospho (ST)	Vnx1	Y	5469	859.394	50.5796	0.364833	2	0.00332522	48.6335	26769.6	10627.1	89512.3	82951.8	44204.7	21498.3	209090	92189.6	19.13	0.00194544	1.13319
	173-TLDYADFADDSEEIKDEDVDHQTSDLENNNNDK-205	[23] Phospho (ST)	Vta1	Y	2753	1298.86	69.9683	1.10488	3	0.000880496	42.9259	1.16555e+06	79414.8	1.25734e+06	572300	233822	100370	339890	85609.6	55.28	0.0064765	1.66339
	652-LMGVDSEEEEIELPPGVK-669	[6] Phospho (ST)	Vtc2	Y	463	1025.97	78.2991	2.85843	2	0.00113036	16.2289	3.85268e+06	230772	3.39535e+06	2.76649e+06	3.73618e+06	546960	7.34078e+06	1.19132e+06	28.11	0.0052439	2.5581
	604-ITSQGDLEADGSSDEETEQEPHSK-627	[12] Phospho (ST)|[13] Phospho (ST)	Vtc2	Y	2615	1375.03	44.4849	1.04175	2	0.000330781	51.0654	1.1295e+06	576785	851744	292105	43608.9	8600.19	1.0704e+06	511127	39.28	0.00534933	1.9466
	176-SNFNTASEPLASASK-190	[12] Phospho (ST)	Vtc2	Y	4311	802.355	53.2205	0.44055	2	0.00417067	96.4411	188843	40254.6	126500	172616	73973.2	71340.6	26767.1	4773.05	31.14	0.00364793	2.27613
	231-SRFSFSDPFSNDSPLSQQQSQQQQQQPQQPQQHSTQK-267	[6] Phospho (ST)	Whi3	Y	1097	1100	74.8911	3.0798	4	5.73128e-05	37.5263	1.08785e+06	408229	3.4313e+06	2.91433e+06	973374	24731.4	6.50554e+06	313540	50.21	0.00935658	2.12845
	99-TNTNRLSITPQDIISSNIGENELSR-123	[7] Phospho (ST)	YBR028C	Y	4820	951.466	79.7512	0.806033	3	0.000101293	65.9057	16476.4	10858.9	114448	92333	28062.7	8147.66	523281	29802.6	41.04	0.0063851	2.23931
	462-SINGDEESTSSANLGAIINLMAIDAFK-488	[10] Phospho (ST)	Ybt1	N	199	954.45	104.764	4.8786	3	4.15289e-06	15.7346	3.94325e+06	466580	2.82912e+06	2.46496e+06	1.03347e+06	84836.1	7.00085e+06	1.10156e+06	52.12	0.00757799	2.64935
	107-HFSLEK-112	[3] Phospho (ST)	Ybt1	N	2107	840.366	48.078	1.4739	1	8.44026e-05	29.966	136782	13094.7	322650	238554	119574	35831.6	742563	203073	19.66	0.000478691	0.570306
	863-SNEFGDSSESSVRESSIPVEGELEQLQK-890	[16] Phospho (ST)	Ycf1	Y	3174	1049.81	75.3247	1.03407	3	0.000397763	19.8913	472978	4990.3	233418	203334	1.07144e+06	17538.2	558219	111037	18.1	0.0047358	1.50515
	891-LNDLDFGNSDAISLR-905	[13] Phospho (ST)	Ycf1	Y	377	865.395	76.2704	5.4814	2	0.00180827	11.7532	4.44613e+06	254367	3.46938e+06	3.02571e+06	5.94216e+06	288381	6.47416e+06	239786	89.79	0.00386894	2.23797
	906-RASDATLGSIDFGDDENIAKR-926	[3] Phospho (ST)|[6] Phospho (ST)|[9] Phospho (ST)	Ycf1	Y	1190	831.005	67.4148	1.6942	3	6.25868e-07	18.9645	637583	120914	2.60203e+06	1.29852e+06	396180	35190.8	141847	2767.65	31.93	0.00513807	2.06349
	512-TPEQHPNDDNSSLAASHK-529	[16] Phospho (ST)	Yck1	Y	5223	676.621	35.1441	0.828733	3	0.000691813	94.3065	209683	31380.6	8462.46	7873.56	21282.5	17002.8	3889.7	302.125	15.91	0.00369906	1.82504
	747-YLQYQQQDIEDSQSIYEYR-765	[14] Phospho (ST)	Ydr089w	Y	2343	1275.05	67.1595	1.01323	2	0.00512228	47.7108	484469	76029.2	668554	599601	366357	174792	1.0485e+06	47732.5	55.91	0.00612988	2.40569
	1-MLLKCSAEASASTITSSNTVFIHYYYSFYGRVSILKGIGNTR-42	[1] Oxidation (M)|[5] Carbamidomethyl (C)|[12] Phospho (ST)|[13] Phospho (ST)|[24] Phospho (Y)|[25] Phospho (Y)|[26] Phospho (Y)	Ydr220c	N	207	1281.31	92.0804	1.8464	4	1.2086e-05	25.2781	1.76906e+07	2.50827e+06	6.74279e+06	4.87816e+06	1.50285e+06	379891	8.07365e+06	1.66492e+06	20.95	0.00143053	0.279335
	251-NNDDDDDDSYDEYEDDVEPVNDLNRDSQLNITK-283	[9] Phospho (ST)	YFL034w	Y	6217	1323.86	70.4417	0.382733	3	0.000109324	51.8909	149836	77751.2	131569	129711	1.09952e+06	231275	22747.7	9131.86	93.86	0.0142305	3.58582
	138-RISNATIAEIGSPLQQVEKPDEVK-161	[3] Phospho (ST)	YFL042c	Y	983	901.465	72.754	1.7116	3	0.0102672	97.8806	609568	382411	1.23107e+06	942677	336391	329262	3.20097e+06	377619	41.94	0.00407643	1.50902
	1181-HSTLGNADPNYLNDDDESSDDDLPLALK-1208	[11] Phospho (Y)|[19] Phospho (ST)	Ygl140c	Y	315	1068.77	79.3259	1.45838	3	0.000222089	15.7248	4.93258e+06	775640	1.89572e+06	1.66602e+06	4.09239e+06	311421	2.21524e+06	139532	31.73	0.00681676	2.12805
	146-LLLSPASSNVDDDRNR-161	[7] Phospho (ST)|[8] Phospho (ST)	Ygr125w	Y	1079	1006.4	60.7387	1.54677	2	0.0163469	21.776	1.9707e+06	429140	1.37735e+06	145019	1.14741e+06	171492	1.63543e+06	80009.8	16.12	0.00386516	1.92222
	70-KSKWTHQSATFADCIYCQSGQSPSVSLSCSDAR-102	[2] Phospho (ST)|[10] Phospho (ST)|[16] Phospho (Y)|[19] Phospho (ST)|[22] Phospho (ST)|[24] Phospho (ST)|[26] Phospho (ST)|[28] Phospho (ST)|[30] Phospho (ST)	YJR146W	N	955	1075.33	91.7152	1.65925	4	6.87669e-07	14.4222	2.01206e+06	167745	744083	119497	575415	18415	3.70032e+06	533668	18.44	-0.0107488	2.5013
	373-DSSNSEDSEDEEMDGPTLLHPGK-395	[8] Phospho (ST)|[13] Oxidation (M)	Ykr018c	Y	2612	862.336	63.4085	0.71245	3	0.0069594	24.8698	236731	58874.5	178290	160149	103663	4651.57	165813	23597.3	27.35	0.00509008	1.96986
	39-TASVADPILDAVQEAQPFEQAADTFHDNMNR-69	[3] Phospho (ST)	YMR295C	Y	802	1161.19	95.7967	0.947317	3	2.06273e-06	12.903	1.03541e+06	98534.7	941807	800721	652107	40503.7	3.18968e+06	411564	69.76	0.00720137	2.06904
	218-FDIDADSEANLRGDSR-233	[7] Phospho (ST)|[15] Phospho (ST)	Yol019w	Y	2022	970.877	59.3114	0.681883	2	0.000204656	23.7468	169481	28589.5	467664	271410	170787	38467.9	528873	78222.7	21.94	0.00357433	1.84269
	187-SSGSRDDDETEELEEK-202	[10] Phospho (ST)	YOL019W	N	17845	913.384	41.7566	0.647233	2	0.00489742	141.421	1551.66	1246.86	15173.6	18205.3	17.1355	24.2332	119344	97078.7	56.65	0.00450391	2.46824
	49-SLLPTGEYIVDR-60	[1] Phospho (ST)	Yor1	N	258	721.851	73.3033	1.21753	2	0.00205305	27.589	1.04025e+06	58411.9	663917	615576	580809	118949	1.88004e+06	278794	35.39	0.00304197	2.11001
	2-TITVGDAVSETELENK-17	[9] Phospho (ST)	Yor1	Y	776	893.413	63.385	1.31777	2	0.00525537	21.6432	1.39219e+06	301314	474150	372417	1.18402e+06	199356	1.00258e+06	158095	65.7	0.00247465	1.38651
	502-TDTFCGTPEYLAPELLLGLGYTK-524	[3] Phospho (ST)|[5] Carbamidomethyl (C)[7] Phospho (ST)	Ypk1	Y	200	1038.14	99.7978	2.06062	3	2.18814e-06	15.5567	1.07931e+07	912034	3.06981e+06	2.74142e+06	2.22691e+06	169158	2.34023e+06	221850	51.87	0.00602175	1.93538
	138-IDEEMAAPSSDGNAGDDNLR-157	[9] Phospho (ST)	Ypq1	Y	2474	1078.93	52.4458	0.838	2	0.00781831	84.103	355717	105284	318723	292011	73934.6	62181.2	444491	153918	60.5	0.00400523	1.85785
	616-DNVGNSSDTEDMDEIDVQDK-635	[9] Phospho (ST)|[12] Oxidation (M)	Ypr091c	Y	9275	1161.44	49.7375	0.5187	2	0.00465642	59.1203	275073	83276.1	82691.2	46999.9	18352.5	136.132	77355.7	45732.9	21.52	0.00614376	2.6472
	498-FFLSGPNLDIK-508	[4] Phospho (ST)	Ypr097w	N	10171	665.83	65.4718	0.270933	2	0.00467154	95.9062	1199.36	807.486	2994.65	2867.98	63023.8	403.299	4851.16	4523.09	15.13	0.00795087	5.97973
	52-KEGDDAPESPDIHFEPVVHLEK-73	[9] Phospho (ST)	Yrb1	Y	2662	642.798	69.7647	0.60585	4	0.000325789	163.644	22213.3	36350.8	40575.7	11028.3	2.17131	3.0707	284675	329900	32.42	0.00474342	1.84773
	331-KAQEEEEDVATDSE-344	[11] Phospho (ST)|[13] Phospho (ST)	Yro2	Y	667	870.302	34.3033	2.7405	2	0.000180625	49.9329	493727	112504	2.25445e+06	2.1063e+06	166219	82998.1	283614	85563.9	70.82	0.00411892	2.36912
	372-GYSLGHGPTHPSNMSNVDDLSHK-394	[3] Phospho (ST)	Ysc84	Y	4003	844.033	55.6375	0.6851	3	4.44675e-06	47.4333	73907	35056.5	218384	180485	6866.03	1593.13	507884	140588	25.04	0.0035892	1.41918
	295-GYGDFDSEDEDYDYGRSPNR-314	[7] Phospho (ST)	Ysc84		5619	812.969	57.757	0.430283	3	0.00209979	76.5632	26.5218	43.3631	14487.3	9654.09	601789	111187	27873.9	5155.27	52.97	0.00401233	1.64718
	9-RGSDVEDASNAK-20	[3] Phospho (ST)	Yta7	Y	18531	664.78	28.7836	0.86585	2	0.00609358	147.156	3376.37	4968.52	232710	346872	602.073	576.109	51188.1	29903.8	52.21	0.00415657	3.13103
	46-NEATPEAEQVKK-57	[4] Phospho (ST)	Zeo1	Y	19884	712.329	34.8993	0.18095	2	7.81128e-05	138.378	415.377	178.85	0	0	55107.2	76256.4	0	0	28.01	0.00425161	2.98854
	386-FSIIAGGSPSSSQEAFDSHGNTEHGR-411	[8] Phospho (ST)|[10] Phospho (ST)	Zrc1	Y	2157	945.72	66.7257	1.15743	3	0.00878869	63.3487	396902	251432	714993	506431	128006	43624.1	739376	58269.9	44.45	0.0057788	2.039
	209-TESLANELVPTSSHATNLASVPGK-232	[20] Phospho (ST)	Zrt2	Y	2122	835.076	71.6587	0.863933	3	3.04525e-05	29.2096	85511.5	20102	239474	213839	42031.2	5762.03	554466	135206	38.13	0.0059927	2.39497
	46-NHTWSEFER-54	[5] Phospho (ST)	Zuo1	Y	2540	643.255	62.0485	1.08287	2	1.51804e-05	76.1397	272433	74647.5	19644.9	10678.8	276537	1570.27	1209.58	920.968	26.16	0.00251139	1.95516
	EESDDDMGFGLFD	[3] Phospho (ST)|[7] Oxidation (M)	These peptides had multiple hits and therefore no protein assignment was possible		317	1144.41	77.4557	2.33142	2	9.52906e-07	14.793	9.01214e+06	691929	2.3866e+06	1.01814e+06	1.19558e+06	176862	2.78014e+06	285612	36.62	0.00615259	2.69048
	EEEAAEESDDDMGFGLFD	[8] Phospho (ST)|[12] Oxidation (M)			64	1051.36	80.6631	4.52727	2	6.14502e-05	17.0696	2.1819e+07	3.72441e+06	8.34638e+06	7.2116e+06	4.70181e+07	1.03171e+06	1.69756e+07	1.98909e+06	25.17	0.00513848	2.44608
	EEEEAKEESDDDMGFGLFD	[9] Phospho (ST)|[13] Oxidation (M)			317	1144.41	77.4557	2.33142	2	9.52906e-07	14.793	9.01214e+06	691929	2.3866e+06	1.01814e+06	1.19558e+06	176862	2.78014e+06	285612	36.62	0.00615259	2.69048
	LPSLDK	[3] Phospho (ST)			4582	752.361	51.0808	0.177717	1	0.000348184	73.1633	69670.5	50973.2	44209.7	19942.3	1366.63	282.064	42841.8	20670.9	15.37	0.00209884	2.79342
	EEEEAKEESDDDMGFGLFD	[9] Phospho (ST)			168	1136.41	85.172	4.99422	2	0.000116831	33.4762	1.83738e+07	6.15084e+06	6.30917e+06	5.4565e+06	1.49163e+06	16520.2	7.88788e+06	849958	78.09	0.00563397	2.48104
	EEEAKEESDDDMGFGLFD	[8] Phospho (ST)|[12] Oxidation (M)			206	1079.89	77.4106	2.12275	2	2.98212e-08	9.67868	1.09038e+07	1.04455e+06	2.56033e+06	2.14879e+06	675491	45775.4	3.21609e+06	311275	55.84	0.00549388	2.5461
	Phosphopeptides without PTMs identified
	42-EYEPESTGSSFHDFLQLFDETK-63	-	Abp1	Y	307	869.393	94.7957	1.83265	3	5.38306e-09	3.60644	1.45438e+06	51887.4	1.12216e+06	971897	1.11462e+06	40198	3.75795e+06	126338	35.9	0.00647412	2.48512
	546-LLETEDFEDNTITTGWLDDLITHK-569	-	Acc1	N	1897	940.46	97.5286	0.720233	3	1.24708e-05	32.1844	254378	51914.6	299322	272489	50056.7	8564.21	1.05965e+06	341041	54.67	0.00469438	1.66564
	613-DLLQTMFPVDFIHEGK-628	-	Acc1	N	1155	945.479	96.6963	1.1041	2	0.000236294	42.9522	301253	129395	516570	422624	143020	46587.9	1.67244e+06	497825	51.22	0.00386093	2.04397
	18-DDSASSGIVDEVDLTEANILATGLNK-43	-	Aco1	Y	2493	1324.15	94.1291	1.13425	2	0.00884915	65.9218	394108	67803.9	1.32934e+07	2.18016e+07	368145	242688	1.23172e+06	346144	91.18	0.0040961	1.54787
	583-DGYLQNNATEGDAEHITPDNLRR-605	-	Acs2	Y	1343	867.078	58.2953	1.7897	3	0.00334546	27.7072	680380	188514	618418	528578	651871	89417.5	1.98885e+06	495103	51.68	0.00500226	1.92527
	100-HAFANPDKPALIYEADDESDNK-121	-	Acs2	Y	1795	1230.57	61.8971	2.16895	2	0.00633864	78.1562	426444	286475	3.2678e+06	1.991e+06	84429.1	20048.4	1.59967e+06	1.25024e+06	89.58	0.00497734	2.02403
	291-EDIYDGETNPDLQNR-305	-	Aim9	N	7853	889.896	53.7469	0.55275	2	0.000470203	64.105	26496.8	16985.8	167861	145532	8648.18	4405.98	117230	12861.5	36.59	0.00156063	0.877855
	58-GQTPEGEDPLGKPEEELTVIPEFGGADNK-86	-	Apa1	Y	323	1018.49	79.846	4.19678	3	8.16347e-09	12.4003	524457	65034.4	3.79602e+06	3.25253e+06	607918	15800.6	1.33424e+07	1.44139e+06	53.36	0.00721872	2.36489
	314-VDEDDENDELSAEGR-328	-	Arc35	Y	2365	846.847	44.7522	0.600733	2	0.000310693	39.4436	143654	51617.6	208438	196172	33593.7	3982.74	594489	216293	68.91	0.00449419	2.65665
	132-DAMKPQEVSDFLELEK-147	-	Arf3	N	4370	939.964	77.6212	1.11655	2	0.00184095	64.5028	41554.9	12528.9	254585	210016	63832.4	17582.3	772059	175791	43.53	0.00440621	2.34634
	140-DRIDSVSQLQNVAETTK-156	-	Atp4	Y	5135	952.491	62.0285	0.59575	2	0.00339029	110.276	9486.94	10461.8	127227	104834	2247.22	818.663	388297	147488	29.14	0.00332819	1.74895
	228-DNLTLWTSDMSESGQAEDQQQQQQHQQQQPPAAAEGEAPK-267	-	Bmh1	Y	1644	1479	69.652	1.82147	3	0.00123516	45.7479	1.19191e+06	148433	1.95532e+06	1.88583e+06	1.16768e+06	34085.2	4.45866e+06	593030	96.4	0.00928463	2.09398
	73-EDAVPQQGFEDASEYFTAIFGGDGFK-98	-	Caj1	N	474	1413.14	103.877	0.8302	2	0.0001769	22.0592	846630	186760	1.10033e+06	929165	923394	85199.3	2.5632e+06	354583	84.9	0.00879123	3.11277
	92-TGTTTNDVDYPIPPNHEMIFTTDDK-116	-	Cdc19	Y	3176	941.433	71.1603	1.97382	3	1.92338e-06	21.8821	232028	50772.6	462819	397135	288193	46363.4	1.88854e+06	205496	21.1	0.00301525	1.06875
	447-EPVSDWTDDVEAR-459	-	Cdc19	Y	1043	759.84	62.4986	1.39915	2	0.000228272	25.3816	341631	85019.3	524042	260725	259502	64562.4	1.49606e+06	379724	42.97	0.00283892	1.87058
	265-GDLGIEIPAPEVLAVQK-281	-	Cdc19	Y	471	874.995	84.2773	1.64082	2	0.000386016	84.4584	163406	138010	1.46728e+06	1.28693e+06	82088.7	19397.4	4.20471e+06	551404	34.18	0.00429126	2.455
	98-NDVRPEWEDEANAK-111	-	Cdc33	Y	645	836.883	50.5796	1.68328	2	0.00753637	34.8056	839858	292318	880493	757352	499653	15457.7	1.43538e+06	336830	54.75	0.00311737	1.86473
	1137-AEDPSNYENVIDIAEQAGK-1155	-	Chc1	N	5979	1031.99	76.2704	0.605083	2	0.00278344	37.2352	79045.9	29166.7	97344.6	63329.6	100586	6666.8	400165	95184.5	47.27	0.00738536	3.58174
	134-DANSNFSTNSNSFSEK-149	-	Cho2	N	7728	874.873	50.407	0.602567	2	0.000150244	28.3505	45626.7	12935.4	81395.4	26797.3	45443.6	3194.33	171365	19247.7	41.27	0.00233107	1.33377
	287-ENEPVAEVADENK-299	-	Chs5	Y	5079	722.335	46.9992	0.623283	2	0.00047788	110.806	44997.9	15456.5	66456.7	46188.3	718.95	796.638	142029	71911.2	42.99	0.00251518	1.74344
	395-QDSVANNEEDVTENK-409	-	Cog8	Y	3936	846.373	41.0232	0.52335	2	6.90491e-06	77.7089	99532.3	33827.1	107141	41805	330.753	257.024	142125	51743.2	56.06	0.00409739	2.42345
	258-YGDDGIYSIIDEGEGIMEVDK-278	-	Cps1	N	4068	1159.53	94.2283	0.5438	2	5.96761e-05	23.8597	232455	55463.1	111343	81414.4	45797.6	9653.93	261606	17219.8	35.1	0.0051025	2.20217
	395-DNGFDQLPVLTEDGK-409	-	Cys4	Y	1286	824.399	75.3026	1.39445	2	2.56416e-06	16.3962	172418	16921.8	531124	462250	228470	37460.4	1.03071e+06	165809	64.69	0.00377574	2.2928
	32-DTRPQTDDVLNTK-44	-	Dhh1	Y	1390	751.878	46.9528	1.21395	2	6.96248e-09	47.8716	278474	133310	337568	122295	0	0	926878	359814	47.72	0.00319476	2.12738
	724-ADASGEGVEDEASGVHK-740	-	Dip2	Y	4481	829.371	41.1593	0.752767	2	0.000732524	70.4094	55036.4	18403.2	69499.2	57745.1	6114.66	4305.29	240613	101693	54.78	0.00399989	2.41434
	569-EIYDREEEEGR-579	-	Dip5	N	7710	712.82	39.6494	1.25295	2	0.000132791	87.779	1446.11	1269.38	91192	50425.4	1428.79	31.0014	215592	116968	30.43	0.00322243	2.26354
	415-EIGDFEDLSTENEK-428	-	Dps1	Y	1348	813.364	64.8957	1.20162	2	0.000557974	86.7293	89744.7	41347.8	274520	128880	55800.2	48395.1	905841	112521	60.92	0.00399735	2.46035
	213-ADFYAPETEGDEAK-226	-	Drs1	Y	5935	771.835	53.8109	0.54515	2	0.00425209	72.1995	37425.8	20339.2	76228.6	39896.6	18007	13001	189698	60721.4	16.39	0.003418	2.2171
	261-DTDAEGKPLER-271	-	Ef2	Y	2342	615.803	35.5513	1.54352	2	0.000272179	128.853	3925.65	2289.08	384974	387540	1570.86	2024.11	181030	85293.9	47.13	0.00312128	2.53847
	565-ETVESESSQTALSK-578	-	Eft1/Eft2	Y	614	748.361	43.4245	1.04613	2	0.00136438	47.9236	259258	124246	390619	375012	62953.9	6285.94	1.08019e+06	490953	41.12	0.00289715	1.93827
	394-DDPVVGPDQPYSIVEK-409	-	Eht1	N	2032	879.435	65.24	0.75325	2	0.00125367	106.571	85703.4	24901.3	543116	441560	23478.6	25021.4	638890	143813	31.17	0.00320284	1.82306
	68-EQQDEIEGEELAESER-83	-	Enp1	N	3808	945.9	55.443	1.32047	2	0.000193995	37.2668	292113	93340.5	367454	259120	67539	4977.33	754791	281287	51.91	-0.0263352	13.9354
	64-DALASHYGDEYINR-77	-	Erg2	N	1862	812.375	55.8593	0.885767	2	6.78941e-06	49.1502	139048	68342.6	287359	169681	9066.51	3300.15	1.16709e+06	290962	41.27	0.00301784	1.85972
	61-GDLTSPDDMENAINESK-77	-	Erg26	N	996	918.403	63.0969	1.38417	2	0.000125286	18.2394	632729	79065.2	681508	544555	734491	64445.1	1.90635e+06	347706	56.63	0.00211204	1.15111
	345-EVEGDDNDRIYENDPNTK-362	-	Erg3	N	1995	1061.96	44.6218	0.93465	2	0.00715828	53.9466	337257	181939	337457	293480	126213	8908.4	956728	395062	38.12	0.0042757	2.01503
	181-MDFEENTFDK-190	-	Erg6	N	2606	638.265	61.7856	1.19102	2	0.00272459	54.3082	166063	22136.8	198706	106842	64317.1	5122.47	476866	107014	52.5	0.00246518	1.93422
	226-DYNEDLVDGR-235	-	Erg9	N	3388	1195.53	51.7716	0.68335	1	0.00452605	71.1339	128142	91152.2	610988	551608	46611.8	17673.8	615565	208345	40.22	0.00255967	2.14285
	126-TLTDEHEADVNNDDIIANNAVEEIDR-151	-	Erp2	Y	1180	975.785	70.4417	1.01108	3	6.1811e-05	50.6291	401755	203405	851653	670833	61028.2	6133.89	2.2036e+06	58875.4	37.41	0.00471904	1.61372
	620-DSSINIENYLEDAK-633	-	Faa1	Y	594	805.883	77.2512	1.2584	2	9.97947e-05	21.2873	640390	58063.2	916262	349719	613495	13468.2	2.17109e+06	373017	58.89	0.00389497	2.41961
	587-EIDPSQTTQLAGMDVEDALDK-607	-	Fas2	Y	2669	1138.54	77.926	0.841317	2	1.34819e-05	22.4925	125678	15585.7	290484	231882	167374	29974.2	990100	222698	64.85	0.003904	1.716
	193-EFGTTPEKPEETPLEELAETFQDTFSGALGK-223	-	Fas2	N	154	1133.55	105.384	1.1931	3	6.72909e-07	17.1562	1.29265e+06	115027	2.56055e+06	2.16336e+06	1.73925e+06	77075.1	7.72172e+06	1.32475e+06	19.91	0.00823463	2.42365
	162-DLLNFNDDHPDGK-174	-	Fra1	N	3038	750.343	65.718	1.35233	2	0.00144514	68.378	43524.6	29761.3	212354	184941	36908.8	12082.5	742057	102606	54.27	0.00222486	1.48456
	320-DDNDEGEELQLK-331	-	Fun26	N	1382	702.811	53.6615	0.70325	2	0.00713375	34.5606	151676	43372.4	167861	139918	93865.5	20782.4	400497	132520	21.27	0.00292558	2.08433
	194-IPVGYSSNDDEDTRVK-209	-	Gas1	Y	1158	598.956	47.7869	1.40802	3	9.15124e-05	77.8815	208045	61752.6	240872	187595	2018.21	1258.04	913861	528704	76.43	0.00258185	1.43928
	303-DPFTGNQQQQNPPTTDDDEDRNHDDDDDYKPSATSIQPTYFK-344	-	Gcd1	Y	752	972.022	64.7374	2.84382	5	0.000485844	17.196	2.81319e+06	55898	1.89154e+06	1.69409e+06	1.72216e+06	20425	4.45605e+06	618227	31.02	0.00703281	1.44855
	49-VAFTGLEEDGETEEEK-64	-	Gcd11	N	1678	891.901	61.1405	1.02318	2	0.000178769	30.4868	226346	64017.7	3.14915e+06	4.63599e+06	152898	13833.3	1.33233e+06	406185	38.36	0.00364709	2.04688
	68-EFEEGGGLPEQPLNPDFSK-86	-	Gcd11	N	3053	1045.49	70.5551	0.677517	2	0.000198482	33.676	104604	35226.5	242898	207691	103591	23674.3	111652	92272.9	37.62	0.00109547	0.524409
	160-EDDLSTHQGLDLDK-173	-	Gdi1	N	1589	793.372	54.4888	1.0552	2	0.00060432	62.1525	174008	67629.7	292872	253219	56287.5	34984.1	704371	145771	49.38	0.00271456	1.71295
	58-DHFSEPLGK-66	-	Ggc1	N	680	515.254	48.078	1.82373	2	0.000321247	140.654	220516	62948.5	355144	207913	79.7047	112.108	1.0102e+06	513200	35.83	0.00161753	1.57271
	175-IDGYSGPELGELMEK-189	-	Grs1	Y	5465	819.388	76.0143	0.80875	2	4.86405e-06	36.7006	21584.8	4374.86	70291.9	36817.8	31405.3	11525.9	340691	59150.8	40.16	-0.00322142	1.96816
	270-ESLEEDPDFLQHALQS-285	-	Grx3	N	9277	929.429	79.4444	0.3748	2	0.00284657	61.0221	29622.4	18076.2	36376.3	14254.8	47460	1321.19	211968	77964.4	20	0.000715798	0.385492
	48-LDDATEDVFNK-58	-	Gus1	Y	244	633.797	57.2556	1.20632	2	0.00156078	58.7196	245340	44888.1	485212	553271	166050	12072.3	1.66579e+06	506963	74.34	0.00213354	1.68582
	633-DRLEEDESFEDFLTPQTEFHTDAIADLNVK-662	-	Gus1	N	4151	1175.54	103.416	2.43538	3	0.00311521	37.1566	736420	45656.9	967298	858614	909829	138764	2.52207e+06	575529	37.23	-0.0316729	8.98872
	269-DSEIDEEDMFNLPDELQLLPEDK-291	-	Hgh1	N	829	1367.62	95.7468	0.9474	2	0.00633039	23.9732	1.07263e+06	257145	990957	825022	1.19041e+06	69870.7	2.4421e+06	581528	49.72	0.00413677	1.51352
	396-LIEAFNEIAEDSEQFDK-412	-	Hsc82	Y	1843	999.473	83.5241	2.22763	2	0.000197689	62.8367	206491	40999.1	422439	395048	498681	103490	3.15086e+06	418284	80.57	0.00427166	2.13912
	179-DDQLEYLEEK-188	-	Hsc82/Hsp82	N	69	1281.59	60.9303	1.72507	1	0.00306346	47.9255	4.07254e+06	1.95178e+06	6.99169e+06	6.05656e+06	4.19535e+06	1.02376e+06	1.74811e+07	4.96298e+06	50.12	0.00218215	1.70404
	244-LEEVDEEEEK-253	-	Hsp82	Y	1768	624.779	40.8619	0.825883	2	0.00144873	123.482	89943.3	11464.9	137905	67391.5	3741.33	4619.88	293418	124218	33.15	0.00255283	2.04629
	84-HLQLAIRNDDELNK-97	-	Hta2	Y	2428	560.302	75.5774	6.6991	3	0.00149356	130.108	1.50588e+06	425502	32504.8	10294.9	3.37407e+06	58266.1	161808	55250.3	28.33	0.00301817	1.7988
	103-HHDGSHYLSK-112	-	Hxt1	Y	2893	590.779	43.8915	5.09828	2	0.0182515	164.304	14375.1	5012.04	957346	1.28781e+06	923.747	674.75	1.03739e+06	1.70448e+06	43.37	0.00219505	1.86093
	115-APEGELGDSLQTAFDEGK-132	-	Hyp2	N	677	932.436	73.1701	1.97795	2	2.54696e-05	18.4994	1.41623e+06	117596	1.23322e+06	67059.4	2.05262e+06	9204.21	3.9826e+06	736755	92.56	0.00304941	1.63696
	166-TETTEIIEIINDEENDDEDGK-186	-	Ilm1	Y	2246	808.028	80.903	1.43742	3	0.0095105	74.9812	130124	90982.8	542621	258354	78539.8	7988.14	1.2545e+06	193307	17.17	0.00642356	2.65321
	280-ENGHSPSEAFNETVEEATQSLYPLIGK-306	-	Ilv5	Y	3003	983.139	95.722	0.707083	3	3.65717e-05	38.7812	93672.2	17208.4	285013	230590	78365.2	30391	684486	80307.2	22.12	0.00698499	2.3707
	66-KLEQSALNSEASEDSEAMDEESK-88	-	Kre2	N	1573	843.039	53.1311	1.74775	3	0.00255955	33.8688	626300	71750.8	601775	560717	322078	907.467	1.49239e+06	505455	37.39	0.00413847	1.63829
	141-EDDEEYEHATVDGK-154	-	Kri1	N	5829	818.836	42.6977	0.68515	2	0.002292	91.4064	4179.15	2070.19	108557	44430.8	3363.66	2360.73	276082	115441	28.28	0.00395047	2.41523
	500-ELESAAYDHAEPVQPEDAPQDIANDELK-527	-	Leu1	Y	913	1547.71	66.1629	1.21228	2	1.14524e-05	33.9539	375677	89366.5	2.14216e+06	1.97282e+06	459657	2005.54	6.73205e+06	2.28579e+06	51.18	0.00467727	1.51201
	364-DREVDDLSNR-373	-	Lsb3	Y	14489	609.79	39.9894	0.40905	2	0.00381701	169.597	0	0	6177.47	10675.1	0	0	32360.9	45586.5	29.37	0.00190273	1.56274
	408-NDSDVPELATIPAAK-422	-	Lys20	Y	2476	770.897	65.718	0.7801	2	0.000229353	35.4445	100381	35579.5	233437	87201	53665.6	5446.1	384093	95648.6	27.89	0.00237892	1.54498
	350-VDQLNLNLTDDQIK-363	-	Lys20	N	155	814.93	70.8462	1.37337	2	8.90204e-06	16.0975	1.11273e+06	24730.8	1.3909e+06	1.23943e+06	1.13425e+06	118582	4.53579e+06	730149	82.16	0.00328123	2.01569
	32-EGEQFANAFFDTEK-45	-	Lys20/Lys21	N	185	816.864	76.2016	2.22655	2	5.30833e-07	17.4343	1.73925e+06	44941.8	2.78494e+06	2.32709e+06	504464	87949.9	6.35677e+06	902154	63.63	0.003572	2.18912
	4371-GGEQNTEGLDGVEEK-4385	-	Mdn1	N	5969	781.354	46.194	0.562083	2	0.00289195	103.192	29167.3	16596.9	212417	251331	3304.97	3410.45	165352	62854.1	45.69	0.00289262	1.85342
	4076-DVEQDEDLTEDAQNENK-4092	-	Mdn1	N	816	996.421	49.0668	1.30142	2	0.00598194	32.6012	959762	224881	874937	743071	619511	58082.5	2.11761e+06	690365	73.66	0.00441483	2.21759
	55-YSSSSDAASADDSTPLRDNDEAGNEK-80	-	Mnn2	N	1954	901.383	45.6328	1.10627	3	0.0042548	40.031	261489	36303.1	229983	226087	136907	40774.6	665634	199517	47.86	0.00445804	1.65044
	209-DELHLDEQEAK-219	-	Ncp1	N	2212	663.813	48.8916	1.10812	2	0.000170894	64.4297	106011	57358.9	150514	114351	7739.51	4986.54	547819	193440	63.36	0.00235032	1.77301
	290-TDIIRPEDLDEER-302	-	Nog1	N	4500	800.896	59.2271	0.278167	2	0.00987467	173.205	74.4241	128.906	59345.4	44370	721.75	1020.71	172407	133516	24.44	0.0036866	2.30445
	389-IDNYSEEPSNVFGSVLK-405	-	Nop56	N	4685	949.465	78.6258	0.723117	2	0.000525349	40.5476	54823.3	19254.6	94022.4	76136.9	55551.2	11120.8	391466	68956.3	56.37	0.00402798	2.12344
	170-NDNHIIQAIALLDQLDK-186	-	Nop56	Y	2736	967.523	94.4509	0.815033	2	0.00223037	59.3731	154409	91677.4	203270	161396	45544.8	2497.29	459112	177431	80.49	0.00544555	2.81711
	438-DKPAAEVEETK-448	-	Nop56	N	1361	608.808	36.1767	2.20515	2	0.00848555	149.211	458989	70713.1	81194.6	131176	256375	27306.7	20672.7	7635.33	44.89	0.00256765	2.11225
	296-SALNADEANTDETEKEEEQEK-316	-	Nop7	Y	5872	794.015	43.8019	0.64125	3	0.000958743	112.869	101764	18764.4	150604	83272.8	3049.05	3441.44	39321.5	12019.2	16.83	0.00428155	1.79971
	318-EQDEGDGQEDNEFIPTFTK-336	-	Nop8	Y	4148	1099.97	71.9568	0.802283	2	0.000114266	33.2628	205502	21315.1	486976	548645	193120	64237.1	614720	63525.9	15.05	0.00496271	2.25791
	450-DSDKPSLPSAVDGENDKK-467	-	Nup2	Y	4412	634.642	48.3248	1.1342	3	0.0041694	141.421	111927	40027.9	170687	102502	269.491	381.118	123141	63954.1	23.16	0.00369447	1.94354
	100-NDIENKEEEYDETHETNISNAK-121	-	Nup60	Y	15973	874.72	47.4215	0.564117	3	0.00051676	164.592	3416.51	2126.62	2567.13	1459.89	0	0	65261.9	107415	42.5	0.000790867	0.301727
	273-LSHMSPEDAEEELK-286	-	Ola1	Y	4760	807.871	57.3867	0.612517	2	0.000892427	68.8177	13303	8217.39	68833.2	60553.8	3824.52	2294.89	311700	84314.1	41.19	0.00315905	1.95761
	7-HDSNASPNSDSEDGHHHNNK-26	-	Om14	Y	12392	550.477	41.6155	2.77787	4	0.00499479	138.596	221988	185025	4241.17	1482.06	543.058	172.931	21982.3	30466.7	16.06	0.00393726	1.79139
	1494-DTNIFQTVPGDENK-1507	-	Pdr12	N	327	789.377	65.2629	1.42977	2	1.96375e-05	28.7894	509877	61453.2	1.68362e+06	578611	315063	59475.4	2.51687e+06	313082	33.11	0.00353212	2.24015
	52-DSDGVQVANESEEDPELK-69	-	Pex19	Y	4790	980.936	53.2651	0.395467	2	0.00365935	68.3013	37081.3	7940.44	58056.5	60308.1	29614	19482.9	264786	60032	40.39	0.00280018	1.42877
	38-NEAESGVSEDNDNGSLEK-55	-	Pex30	Y	3900	947.403	40.955	0.823267	2	0.00127663	54.1069	141273	21658.7	139441	49281.3	28015.7	15158.4	280662	105977	68	0.00497033	2.62593
	68-DLIDKPDDAATAETTSFGWGK-88	-	Pga2	N	3490	1119.53	72.0012	1.14337	2	0.00567048	67.784	137552	47449.3	472671	47411.2	118082	80040.8	922908	103907	70.09	0.00600511	2.68439
	245-VLENTEIGDSIFDK-258	-	Pgk1	Y	3153	790.398	72.6225	0.533333	2	4.73148e-05	80.3599	15393.5	3077.88	752691	1.13185e+06	7874.29	6327.77	288573	64205.3	74.48	0.00359365	2.27623
	43-HHVVEPHDANDENLPLLADASPDDQFYISK-72	-	Pho91	Y	1720	1129.54	88.2419	1.28478	3	0.00127504	47.1134	474220	130409	684303	645475	85373.4	17414.1	949996	447575	41.65	0.00908912	2.68465
	85-QLSIWGLENDDDVSDITDK-103	-	Pil1	Y	2641	1082.01	83.3164	1.4976	2	0.000557209	38.87	278140	15593.8	420142	344624	420800	69417.7	1.62576e+06	319615	46.22	0.00644237	2.97982
	276-QDYEDFEPEEGEEEEEEDGQGR-297	-	Pil1	N	1366	1323	58.0135	0.8453	2	0.000433575	56.5237	215358	121728	889277	740052	112574	16426.2	1.71578e+06	453607	79.53	0.00566415	2.14228
	310-DTDTETTVVEDANNPEDQESTSPATPK-325	-	Pim1	N	3761	1446.13	53.5052	0.461467	2	0.0083129	100.09	81496.8	71319	208543	52676.8	32997.8	33027.4	618559	278114	66.31	0.00428921	1.48403
	119-DTDNDVEPTRDDEIVNK-135	-	Pim1	N	20578	987.951	48.033	0.3356	2	0.016261	91.9963	1114.53	941.002	9881.81	8994.95	162789	63255.6	2509.82	2308.94	38.49	0.00576726	2.92179
	199-WDDISDDVQDKK-210	-	Plb1	Y	8969	732.337	52.0747	0.4116	2	0.00722428	61.9183	27058.6	16754.2	80318	57644.5	11706	4745.72	42584.8	15619.7	42.77	0.00181346	1.23984
	626-GYLVAMTGDGVNDAPSLK-643	-	Pma1	Y	2339	904.45	71.1819	0.63275	2	0.000665873	100.219	98547.1	28619.4	242828	202349	31953.6	32023.6	919102	335198	72.8	0.00382371	2.11619
	644-KADTGIAVEGATDAAR-659	-	Pma1	Y	3097	773.398	48.0115	1.11997	2	0.00102497	127.86	53094.4	24138.6	126599	63736.2	1616.01	2066.23	357547	189304	21.39	0.00288851	1.86985
	483-TVEEDHPIPEDVHENYENK-501	-	Pma1	Y	6	765.346	49.8641	4.33945	3	0.000194643	25.6637	3.38028e+07	8.67503e+06	4.61886e+07	4.05918e+07	2.58017e+07	2.87915e+06	1.27974e+08	3.07499e+07	59.53	0.00342162	1.49219
	185-DGQLVEIPANEVVPGDILQLEDGTVIPTDGR-215	-	Pma1	Y	5	1630.34	92.879	2.93392	2	9.06813e-07	28.7686	3.21548e+07	9.25047e+06	1.18409e+08	1.09249e+08	6.64051e+06	676237	2.96953e+08	4.33383e+07	15.5	0.00675616	2.07329
	457-KVTAVVESPEGER-469	-	Pma1/Pma2	Y	5815	700.874	44.5767	0.62205	2	6.84619e-06	100.719	31063.6	29282	235901	83766.2	0	0	109705	110495	78.13	0.00335442	2.39648
	658-NSDDTLEEINEDNKK-672	-	Pmc1	Y	6201	882.402	48.9353	1.02098	2	0.000550995	65.2106	61855.4	40336.2	149710	127712	9107.13	4317.93	150529	57260.5	53.62	0.00434474	2.4647
	193-EGDDVADAFQR-203	-	Pyc1	Y	5352	611.771	56.0389	0.5292	2	5.02344e-06	85.748	15294.9	10777.9	60086.3	39177.3	0	0	129205	110790	56.07	0.00200722	1.64321
	397-DAEDLGDVEEDSAEAK-412	-	Rpd3	Y	1255	846.86	53.1529	0.857367	2	0.00171338	69.9847	203319	51877	247368	163298	110431	77284.8	885562	271469	82.31	0.00366609	2.1671
	64-NDIHPFEDMSPLEFFSEK-81	-	Rpf2	Y	3509	728	94.6492	0.639617	3	0.000508021	65.7418	97933.6	10617.2	38077.4	51469.2	5054.73	803.513	217025	46489.6	24.52	0.00440372	2.01916
	522-EETDEALGPQETEDGEEK-539	-	Rpg1	Y	394	1003.42	46.0803	1.63523	2	0.00958012	37.5972	1.53422e+06	316157	1.23097e+06	1.10811e+06	966862	175854	3.74859e+06	1.40936e+06	74.65	0.00446778	2.22851
	134-FPTPVSHNDDLYGK-147	-	Rpl1A	Y	610	795.385	57.1	1.52937	2	0.00531457	39.4547	539320	212787	393075	325270	575742	183798	1.72397e+06	462134	76.38	0.00263638	1.6594
	258-LDQVWGSETVASSK-271	-	Rpl4A	Y	4765	753.877	59.5432	0.37785	2	0.00367094	171.439	2623.82	4498.24	43800.4	47207.3	0	0	300200	268186	51.28	0.00256262	1.70191
	121-GVEEVEGEYELTEAVEDGPRPFK-143	-	Rpl5	N	804	860.412	83.9028	8.29378	3	0.000715273	29.2979	4.52759e+06	1.32649e+06	3.33507e+06	2.83292e+06	2.83874e+06	207399	1.27451e+07	1.87005e+06	48.4	0.0056455	2.1897
	58-EDDSSLYEASLNALK-72	-	Rpn1	N	8044	827.896	75.0508	0.59075	2	0.00827853	64.447	58371.9	37618.9	63615.6	46654	6843.46	2730	148336	40937.3	23.12	0.00445654	2.69477
	240-DFLNNGEVDSASDFISK-256	-	Rpn3	Y	2487	929.43	75.3694	1.19255	2	0.000235983	21.3728	414020	19494.1	555510	449145	296653	49933.8	1.05412e+06	196633	52.77	0.00233918	1.25976
	55-EILSGFHNAGPVAGAGAASGAAAAGGDAAAEEEK-88	-	Rpp1B	Y	1076	1008.82	64.4425	2.64008	3	0.000393133	28.3596	1.41122e+06	59993.5	850310	782654	2.08793e+06	15790.1	4.45314e+06	1.01446e+06	45.98	0.00604288	1.99869
	49-SVDELITEGNEK-60	-	Rpp2A	Y	2509	667.329	57.1	0.593717	2	0.000142831	60.8247	109531	33461.9	46691.8	28400.2	1559.56	610.454	193791	67393.1	27.74	0.00216462	1.62431
	192-TQPWSIMPDLYFYRDPEEVEQQVAEEATTEEAGEEEAK-207	-	RPS0A	Y	790	1482.34	95.6738	1.21445	3	0.000249222	18.0057	4.01006e+06	333021	5.5913e+06	4.97907e+06	2.64185e+06	475684	6.0631e+06	869661	80.84	0.00959422	2.15892
	50-ADRDESSPYAAMLAAQDVAAK-70	-	Rps14A	Y	3875	1090.52	70.6007	0.876917	2	0.000759936	48.2821	103626	45900.7	330455	317164	68752.8	4554.85	940423	393394	93.08	0.00348381	1.5988
	115-IEDVTPVPSDSTRK-128	-	Rps14A/Rps14B	Y	9260	515.271	46.4615	0.718533	3	0.000109184	84.305	17487.4	10613.6	20561.2	17334.2	0	0	5778.05	10007.9	43.57	0.00228472	1.4809
	97-DYHTLANNVESK-108	-	Rps18A/Rps18B	Y	161	695.835	49.3031	1.68957	2	0.0102579	43.4454	1.41817e+06	616130	1.58803e+06	1.41079e+06	878667	136128	3.44138e+06	1.16298e+06	61.02	0.0028921	2.08117
	131-DLDRIAAQTLEEDE-144	-	Rps19B	Y	853	809.386	70.936	1.87748	2	1.32597e-07	27.3077	18187.5	4428.87	12234.4	10985	4.39179e+06	87409.6	54928.9	14999.8	64.41	0.00374109	2.31395
	4-SSVLADALNAINNAEK-19	-	Rps22A	Y	3264	815.427	91.5184	0.88415	2	0.000627102	55.1925	259645	40654.1	93574.5	89465.4	16251	8969.37	275695	116371	77.94	0.00336293	2.06462
	52-DLSEASVYPEYALPK-66	-	Rps26B	Y	4953	841.421	72.0708	0.552683	2	0.00122939	76.7869	52053.1	15963	37329.1	9971.31	17068.4	13106.3	202768	24825.9	21.98	0.00314199	1.86932
	224-DYRPAEETEAQAEPVEA-240	-	Rps3	Y	19	952.931	52.2901	3.05815	2	0.00675918	21.4547	1.32483e+07	1.60882e+06	7.86077e+06	7.06165e+06	1.17163e+07	1.29526e+06	2.30424e+07	4.94368e+06	73.3	0.00309976	1.62816
	162-IDLASGK-168	-	Rps4	Y	4065	703.4	41.6155	0.59595	1	0.00654826	173.205	4754.62	8235.24	99130	63617.5	0	0	177289	73506.9	29.44	0.00150573	2.14372
	150-EDDVRDFVIRR-160	-	Rps6A/Rps6B	Y	4630	710.372	62.877	1.7412	2	0.00521682	166.664	98062.9	163435	1636.48	1054.04	1.51179e+06	87748.6	1762.03	1252.03	16.17	0.00329973	2.32584
	31-RIGQEVDGEAVGDEFK-46	-	Rps6b	Y	1495	874.928	58.3375	2.61185	2	0.00548965	38.2786	724874	277472	551384	367987	1.18647e+06	256088	2.29078e+06	668612	89.74	0.0031217	1.78604
	116-KGEQELEGLTDTTVPK-131	-	Rps6b	Y	1334	872.953	60.5425	1.84747	2	0.00339744	92.8399	450270	263528	607703	525047	135168	125490	1.84378e+06	474925	84.68	0.00259753	1.4895
	319-FDDGAGGDNEVQR-331	-	Rpt1	Y	4189	690.288	40.7232	0.827533	2	0.000170914	49.0318	72272.1	21236.8	134446	124429	6344.76	1838.54	181078	88785.8	62.43	-0.0126427	9.17082
	843-DKDDDGLEPDVENEK-857	-	Rsc2	N	2966	859.375	47.9241	0.991467	2	2.14664e-05	30.4706	193733	59031.6	501737	452325	17427.8	2664.74	266469	50864.2	62.72	0.00340584	1.98391
	512-DQEGDDEDGNTATGHGVK-529	-	Rsc8	Y	15606	922.882	31.5093	0.533767	2	0.000146644	130.711	0	0	25807.1	34424.8	0	0	60884.5	68774.7	77.3	0.00446304	2.42064
	224-DGNVGNFNETEQILLAENPESEK-246	-	Sac1	N	548	849.735	77.3428	2.42587	3	0.000372524	36.1835	1.12739e+06	137186	1.16705e+06	1.18088e+06	864101	89524.6	4.32244e+06	603166	33.41	0.00557858	2.19096
	134-IDAPNAVSEAELR-146	-	Sar1	N	773	692.858	59.1182	0.836117	2	0.0021996	40.5248	206685	55820.1	236179	233084	135155	25600.8	783691	247265	47.31	0.00224201	1.6203
	86-DYFPEVNGIVFLVDAADPERFDEAR-110	-	Sar1	N	265	962.134	103.756	1.19372	3	0.000174603	25.3593	1.11956e+06	205189	1.72585e+06	1.49149e+06	572762	660.579	2.77027e+06	702520	15.02	0.00804031	2.78851
	500-EDFLNALNDVTPAFGISEEDLK-521	-	Sec18	N	3328	1219.09	95.8217	0.702133	2	4.69396e-05	28.6109	142117	34529.3	337744	250356	106228	1014.54	733180	209769	34.57	0.0046779	1.92019
	88-ELASQSFINWLGEEK-102	-	Sec53	Y	4338	875.938	89.8974	1.3155	2	4.17217e-05	42.5541	23510.8	10004.8	324398	175826	45905.9	15152.5	562036	150794	59.71	0.00435534	2.48897
	1249-HHNQTLSPEISK-1260	-	Sec7	Y	5108	695.859	47.2649	1.09993	2	0.00966405	140.139	104.444	106.639	137483	112782	208.7	292.47	172851	225947	41.57	0.00338606	2.43654
	251-SDFVTLHVPATPETEK-266	-	Ser33	N	5819	590.969	68.2134	0.611283	3	0.00991725	100.78	32059.8	31066.7	63097.6	48532.1	0	0	51152.4	51551.4	26.28	0.00294565	1.66432
	82-DDAENVEINIPEDDAETK-99	-	Sgt2	Y	3779	1008.95	62.3409	0.51535	2	0.000351387	46.253	63922.3	19798	445542	310634	84205.5	38947.6	543941	80621.4	32.93	0.00373537	1.85297
	403-GMGEEDFHR-411	-	Shm2	N	2520	539.23	43.064	2.06133	2	0.00184091	82.6286	160491	17401.6	199424	209090	20814.7	17198.9	248607	93826.1	53.42	0.0108644	10.093
	302-EYQEAIKPVEYPDK-315	-	Slg1	N	4532	854.927	54.2139	0.802533	2	0.000866198	71.0824	27771.8	19740.9	109880	31910.4	20952.9	620.687	213454	50080.4	22.41	0.00339095	1.98552
	93-DLEAHPAEESQAQPPAYDEDDEAGADVPLMDNK-125	-	Sna3	N	1717	1189.85	66.0959	1.09832	3	9.97683e-08	14.5829	590915	37241.1	1.18934e+06	548306	179339	7775.04	2.17606e+06	317332	31.49	0.00707176	1.98281
	335-DGSSPDNDEIDDNLVNILSSTMGYEK-360	-	Snf1	N	1910	1414.63	97.5286	0.671667	2	0.000735149	30.9499	738149	106011	621615	527242	259551	36299.4	1.19178e+06	368856	111.98	0.00935583	3.30918
	142-DEGDNKDEDDDEDDDDDDDDEDDDDEAPTK-171	-	Spt5	Y	3062	1144.38	37.0265	1.17517	3	0.00626138	88.3804	842177	168883	750627	181911	11411.3	2747.62	225235	199064	110.83	0.00807766	2.35493
	144-DGFESAVGEEDSK-156	-	Sro9	Y	734	1369.58	51.4162	1.19147	1	0.0105468	58.0967	477709	277533	872633	682841	547595	194075	2.41656e+06	904940	46.01	0.00257699	1.88298
	218-ATAGDTHLGGEDFDNR-233	-	Ssa1/Ssa2	Y	564	838.371	49.1547	1.41222	2	5.34382e-05	54.5826	343178	187316	973749	856598	42049.5	16421.5	2.6688e+06	1.05775e+06	76.4	0.00333817	1.99327
	205-VGEDDQTEAQGALINLIQGLR-225	-	Ssh1	N	730	1120.58	96.353	1.51402	2	0.00520638	30.0453	800322	229635	689755	545821	961133	58876.5	2.39497e+06	719577	98.8	0.00504839	2.25461
	1046-DILHFTEGQNTLDEHAVDENEVEEVEHDIPER-1077	-	Ssm4	N	3186	940.433	81.1881	1.46317	4	0.000320397	59.1061	47649.6	10462.6	298072	334630	95570.6	5998.07	1.57897e+06	933267	40.23	0.00504642	1.34296
	238-NVEDAQQDVEQGVGHTNK-255	-	Sso2	N	435	984.458	49.3031	1.45382	2	0.00891243	59.8223	568021	339803	832897	699711	506971	152480	2.73577e+06	1.15709e+06	102.58	0.00413692	2.10327
	46-LPPVLEDEIDDETFHK-61	-	Ste24	N	10428	632.98	74.1009	0.446833	3	0.000184603	166.184	0	0	0	0	0	0	78139.1	129855	17.32	0.00312491	1.64823
	1511-DDEGIQEDEIKPTLDR-1526	-	Stt4	N	860	936.947	58.1016	0.755383	2	0.00171846	49.5855	292599	145087	401350	307157	226278	46973.4	1.27447e+06	351495	35.18	0.00373122	1.99331
	277-FDQEVADENDDTK-289	-	Stt4	N	8958	763.317	42.0564	0.555417	2	0.00470939	76.1868	49205.3	13124.6	31189.6	29937.7	6259.56	4768.96	67186.9	12876.6	22.89	-0.00261184	1.71311
	26-AAEAGETGAATSATEGDNNNNTAAGDKK-53	-	Sub2	Y	3879	879.396	36.1767	1.36473	3	0.00183124	53.6878	199254	44859.2	435578	188246	45352.6	4598.58	498482	267624	25.79	0.00616538	2.33966
	740-ETPANAKPQEEAPEDESLIVISSPQVEK-767	-	Swh1	Y	3151	1012.51	68.9569	0.807467	3	0.000357576	27.1343	213531	47061.4	397667	280389	161382	6208.11	561412	152335	16.28	0.00316972	1.04456
	330-DDSPQEIHEFLER-342	-	Taf6	N	4027	807.876	68.2134	1.23115	2	3.8299e-06	40.3256	80076.9	32291.5	147718	91476.5	9492.58	1406.18	541577	85572.8	57.68	0.00441069	2.73322
	751-DENDKYEETIDEK-763	-	Tcb1	Y	7457	814.355	45.5428	0.764317	2	0.00170979	61.7568	36930.8	22807.3	90150.7	67129.7	5284.93	1179.23	83721.3	41833.4	48.41	0.00486082	2.98816
	975-EWEVAEIEDPFDSDEK-990	-	Tcb3	N	2244	969.421	84.3009	1.05532	2	0.000533307	62.3649	132543	34574.7	283923	249101	200450	49052.2	1.50605e+06	200155	52.66	0.00541596	2.79632
	650-EEDENEESSQTDVGIAK-666	-	Tcb3	Y	3179	940.407	44.6444	0.644683	2	0.0105373	56.7308	154064	47974.2	154952	131963	65884.4	16056.4	655434	371833	47.7	0.00190447	1.01366
	1208-AGDNDDLGQASLDVSSLEVGK-1228	-	Tcb3	N	1136	1045.5	72.2551	0.80585	2	0.000148463	44.5555	470542	64629.8	505035	428048	228360	101747	1.52757e+06	225059	55.82	0.00265814	1.27246
	957-KFEATQEENEQEMEK-971	-	Tcb3	N	11494	935.414	44.5086	0.574867	2	0.000306294	141.421	24026.9	25376.8	60943.3	29853.6	5.17104	7.31295	116869	120946	38.56	0.00424744	2.27281
	289-SVEMHHEQLEQGVPGDNVGFNVK-311	-	Tef2/Tif2	N	765	1275.61	63.632	3.35127	2	0.00551457	74.7875	1.7936e+06	1.00382e+06	5.25791e+06	4.77403e+06	410384	30006.6	8.43112e+06	6.30542e+06	109.92	0.00452805	1.77626
	375-LDPTKEEDK-383	-	Tef4	Y	21495	537.771	34.9896	0.2203	2	4.83712e-08	84.6231	10777.2	9119.98	0	0	0	0	0	0	23.65	0.00283309	2.63906
	226-KDELTLEGIK-235	-	Tif2	Y	2123	573.325	61.1616	0.9377	2	0.000113518	85.1178	49574.3	42196.6	271647	177012	0	0	438337	356532	56.01	0.0022355	1.95302
	64-DVPANASFNLEDPNIDFER-82	-	Tim11	N	2907	1082.01	78.2767	0.679467	2	0.000126472	23.8865	160591	38359.6	234701	168438	407620	11806.2	605714	70732.7	51.59	0.00425078	1.96614
	405-DPEQIDDDETEGWK-418	-	Tim44	N	4293	838.851	56.791	0.841733	2	0.0010238	44.9248	85499.5	38410.5	2.28805e+06	3.54226e+06	79534.6	20577.2	316888	36997.5	52.25	0.00347873	2.07601
	29-HNTAGDDDQEEEIQDILK-46	-	Tlg1	Y	2296	1035.46	70.8676	0.471267	2	0.00804613	71.7375	102579	42115.6	275148	299425	99006.8	49876.9	1.02271e+06	522708	53.01	-0.00559323	2.70346
	6-DIFSNDELLSDAYDAK-21	-	Tma19	Y	1280	908.42	80.6881	1.4142	2	3.83561e-06	22.6739	352147	62097.1	619530	521119	486211	56475.9	2.90649e+06	659015	61.65	0.0049101	2.70556
	9-DDVVQLDEPQFSR-21	-	Tom22	Y	1946	774.371	66.1172	0.916817	2	8.46371e-05	29.2335	151314	37155.4	227518	145997	213863	6197.74	962028	166332	47.33	0.000821108	0.530868
	220-TDGSAPGDAGVSYLTR-235	-	Tom40	N	3762	783.875	58.1856	0.454783	2	3.55293e-05	43.8907	43089.8	18912.4	69839.8	64089	3738.93	730.411	286615	109832	31.27	0.00267582	1.70899
	344-NDPLGAHEDIK-354	-	Tom70	N	16719	604.801	47.2877	0.39705	2	0.00366691	162.135	31370.5	10614.8	8952.67	14515.4	0	0	19042.8	28666.1	33.85	0.00341136	2.82494
	403-DKYDSYPVLTDDDTFK-418	-	Tsl1	N	12538	961.442	68.869	0.157333	2	0.0100791	101.229	5395.29	5461.6	323758	290410	3695.39	3578.01	18910.8	13600	49.62	0.0069327	3.60916
	122-NIGDNENTATEVEK-135	-	Tyw1	Y	3414	767.356	43.4245	0.623667	2	0.0092121	66.6883	41182.3	13407.3	111417	65817	27347.5	18237.6	187576	84707.8	53.14	0.00271838	1.77359
	746-SDDSNSKPNVDEYK-759	-	Uba1	N	2766	799.354	39.9434	1.82622	2	0.00537957	48.2742	174366	65007.6	358068	284083	85084.8	41074	496448	203317	43.6	0.0029412	1.84206
	170-LDEGDAANTGDETEDPFTK-188	-	Ubc6	Y	3397	1012.93	58.3179	0.475467	2	0.00665312	78.2751	70323.7	55046	71349.8	60060.6	41761.7	4019.32	475574	154083	65.41	0.003318	1.63945
	423-DSHSAEFYPDIDEK-436	-	Ura7	Y	5294	826.859	59.9124	0.499133	2	0.0100675	123.069	5541.08	4097.99	57854.8	18028	6180.79	7606.63	198804	126982	54.27	0.00283982	1.71933
	529-EDDASGNNLLK-539	-	Utp20	N	9085	588.281	47.8093	0.402433	2	0.00014644	139.148	4043.37	4436.36	20638.5	28718.1	0	0	51056.9	34836.8	16.82	0.00166577	1.41822
	188-EDHFIDGK-195	-	Vcx1	Y	1123	480.726	42.3113	1.87847	2	0.00316904	141.421	1994.3	2445.1	227165	261236	335.46	474.412	747954	337156	27.11	0.00166415	1.73451
	109-HQNEGQSEDNKEEWGEFLHLPGK-131	-	Vps1	Y	1219	677.815	87.2789	1.8033	4	0.000265352	115.593	569712	249963	1.16256e+06	449712	1824.82	1970.77	554526	640994	47.42	0.00622133	2.29805
	210-EGTAGERENENESNVKPENQFK-231	-	Vps29	N	4448	836.055	42.7429	1.57195	3	6.3094e-06	58.4866	199574	69651.8	277370	69025.7	2482.83	1452.12	525831	188686	32.89	0.00606102	2.41944
	195-DIKPDNFLIGRPGQPDANK-213	-	Yck2	N	1967	699.037	66.2063	2.90278	3	1.75899e-07	25.3596	254554	64554	552781	417371	13801.5	1131.41	1.1869e+06	265159	23.56	0.00401006	1.91495
	107-DPNDFDFDIDDLINEDELDERREEEK-132	-	YDL121C	N	6085	807.107	92.0804	1.46808	4	3.89688e-05	48.5212	12077.6	4942.84	12423.6	11530.9	814234	230477	14736.2	4751.1	45.41	0.0090529	2.80763
	319-RVGNVGEDDAIPEVSHAGDVSTTLQVVNELLK-350	-	Yef3	N	887	1121.25	93.4884	1.35737	3	5.14625e-05	38.8936	654940	254729	1.27667e+06	985864	163876	49474.2	2.55289e+06	660348	74.25	0.00402398	1.19736
	27-HEIASEVASFLNGNIIEHDVPEHFFGELAK-56	-	Yef3	Y	2518	838.17	102.932	3.3559	4	9.77539e-06	38.2967	412469	157962	1.52192e+06	1.37247e+06	97319.2	18704	2.16373e+06	294764	40.04	0.0111822	3.33931
	501-DGYENLTGITSDPDEIEK-518	-	YFR006w	N	4263	998.457	67.9202	0.8715	2	0.000188737	54.0055	78750.2	42529.4	237394	169582	28456.7	3040.36	466532	58074.8	35.4	0.00385176	1.93081
	1-TDIDSEHPEAQPLLNNNHR-19	-	YNL115c	Y	3192	734.019	51.835	1.20703	3	0.00315276	118.452	127687	45132.7	162650	107001	11556.9	13689.4	327557	139038	37.65	0.00375213	1.70627
	List of new phosphosites
	Phosphopeptide	Phosphoprotein	New phosphosite
	6-S*LYELK-11	Agp1	Ser 7
	505-FLT*S*LAALVNS*TSSQKYIVLTGNARMQQRPIAPLVDSLRANGTK-548	Aro1	Thr507, Ser508, Ser541, Thr547
	545-LAS*MVKDS*VKY*QETDPHT*ASINLKK-569	Atg20	Ser 548, Ser 552, Tyr555, Thr 562
	253-SSEASSFTQNEEAISS*LCDVESKDTR-278	Caf4	Ser 267
	76-NEDNDYS*DWEDDEDT*ATEFVQEVEPLIDFPELHQK-110	Cdc123	Ser82, Thr90
	2777-EELDEEVGAS*IAIDDY*MHYAS*KIVGGTIIDIPKLAVHMT*T*LQEEKT*NNLEY*LFACS*FS*DK-2836	Csf1	Ser2786, Ser2795, Ser2797, Ser2815, Ser2816, Ser2822, Tyr2827, Ser2832, Ser 2834
	1017-SQSVISAESILFT*LIDFENEKYSQR-1041	Csf1	Thr1029
	136-DVPEPITEFTS*PPLDGLLLENIK-158	Ded1	Ser146
	557-EQEEETNS*LVS*DSEK-571	Dur3	Ser564, Ser567
	2502-IEFSEDISS*DFNEMLK-2517	Fmp27	Ser510
	383-NNS*SALINSPLNFLIK-398	Fre8	Ser385
	115-TNFRSSSIYPPGT*VY*AVT*Y*TES*CLLHALLMLFSESMMEAAK-155	Iml2	Thr127, Tyr129, Thr132, Tyr133, Ser137
	73-VLNTPEASLIYDDDREFPDGGLK-95	Mch4	Thr76, Ser80
	229-SSAAAS*DNDS*IDAIS*DLEEDANDGLVDRDEDEGVER-234	Npa3	Ser234, Ser238, Ser243
	436-KWSVS*AQWGGT*S*GQPLVT*GIVFEEPDIIVGEGVSSKAISQKMPTDSGR-483	Nrd1	Ser440, Thr447, Ser448, Thr443
	800-LPETPS*DEDGEVVEEEAQK-818	Nup159	Ser808
	237-DYEPLMSTETPLPLHNDNSGT*VLGTA-262	Rbd2	Thr257
	115-S*LEDLGAGDQGIMFGYATDETPEGLPLTILLAHK-148	Sam2	Ser115
	208-RS*ATRAR-214	Slx5	Ser209
	382-KNDNHNDLKITDGFISKY*SS*ADGLIPAQY*ILNANNLIIQFTTR-424	Spa2	Tyr399, Ser401, Ser410
	110-ILDDVS*NDDDDDDDDDDDNDK-130	Src1	Ser115
	571-NIFVSPSLT*EIDK-583	Tat1	Ser579
	136-EDQS*GENELDPEIEFVTFVTGDPENPHNWPSWVR-169	Tpo2	Ser139
	140-EGDS*SGANDEAPDLDPEIEFVTFVTGDPENPHNWPAWIR-178	Tpo3	Ser143
	559-EAETEGGIDDVNAVDGELNLT*R-580	Tpo4	Thr579
	1-SSS*VTSASSHY*IGLPQEAQINGEPLQR-27	Tps3	Ser3, Tyr11
	317-IAQES*KEQS*LPATPLY*NFSVLSSS*T*HENYLKYLYK-351	Utp22	Ser321, Ser325, Tyr332, Ser340, Thr341
	462-SINGDEESTS*SANLGAIINLMAIDAFK-488	Ybt1	Ser471
	107-HFS*LEK-112	Ybt1	Ser109
	1-MLLKCSAEASAS*T*ITSSNTVFIHY*Y*Y*SFYGRVSILKGIGNTR-42	Ydr220c	Ser12, Ser13, Tyr24, Tyr25, Tyr26
	70-KS*KWTHQSAT*FADCIY*CQS*GQS*PS*VS*LS*CS*DAR-102	YJR146W	Ser71, Thr80, Tyr86, Ser89, Ser92, Ser94, Ser96, Ser98, Ser100
	187-SSGSRDDDET*EELEEK-202	YOL019W	Thr196
	49-S*LLPTGEYIVDR-60	Yor1	Ser49
	498-FFLS*GPNLDIK-508	Ypr097w	Ser501
